# **Comparison of decision-related signals in sensory and motor preparatory responses of neurons in Area LIP**

**Abbreviated title: Decision signals in LIP sensory & motor responses**

**S. Shushruth (ಶುಶ್ರುತ್)<sup>1\*</sup>, Mark Mazurek<sup>\*§</sup> and Michael N. Shadlen<sup>1</sup>**

<sup>1</sup>Zuckerman Mind Brain Behavior Institute, Kavli Institute, Howard Hughes Medical Institute, Dept. of Neuroscience, Columbia University, New York, United States.

\* Equal contribution

§ Deceased

Corresponding author: MNS (Email: [shadlen@columbia.edu](mailto:shadlen@columbia.edu))

Number of pages: 30

Number of figures: 9 (+3 Extended data figures)

Number of tables: 2

Number of words –

Abstract: 143

Introduction: 621

Discussion: 1461

Conflict of interest: The authors declare no competing financial interests.

Acknowledgements: This work was supported by HHMI, NEI (R01 EY11378), NCR (RR00166). The authors thank Drs. Fetsch, Jeurissen, So, Steinemann and Zylberberg for advice on earlier versions of the manuscript.

## 1 **ABSTRACT**

2       Neurons in the lateral intraparietal area (LIP) of Macaques exhibit both  
3 sensory and oculomotor preparatory responses. During perceptual decision making,  
4 the preparatory responses have been shown to track the state of the evolving  
5 evidence leading to the decision. The sensory responses are known to reflect  
6 categorical properties of visual stimuli, but it is not known if these responses also  
7 track evolving evidence. We compared sensory and oculomotor-preparatory  
8 responses in the same neurons during a direction discrimination task when either  
9 the discriminandum (random dot motion) or an eye movement choice-target was in  
10 the neuron's response field. Both configurations elicited task related activity, but  
11 only the motor preparatory responses reflected evidence accumulation. The results  
12 are consistent with the proposal that evolving decision processes are supported by  
13 persistent neural activity in the service of actions or intentions, as opposed to high  
14 order representations of stimulus properties.

## 15 16 17 **SIGNIFICANCE STATEMENT**

18       Perceptual decision making is the process of choosing an appropriate motor  
19 action based on perceived sensory information. Association areas of the cortex play  
20 an important role in this sensory-motor transformation. The neurons in these areas  
21 show both sensory- and motor-related activity. We show here that, in the macaque  
22 parietal association area LIP, signatures of the process of evidence accumulation  
23 that underlies the decisions are predominantly reflected in the motor-related  
24 activity. This finding supports the proposal that perceptual decision making is  
25 implemented in the brain as a process of choosing between available motor actions  
26 rather than as a process of representing the properties of the sensory stimulus.  
27

## 28 INTRODUCTION

29 The life of animals is a constant process of deciding what to do next based on,  
30 among other things, the perception of the world around them. In primates,  
31 perceptual decision making has evolved into an efficient mechanism of translating  
32 the perceived state of the world into possible motor actions (Cisek & Kalaska 2005,  
33 Klaes et al 2011, Kubanek & Snyder 2015). The motor system receives continuous  
34 access to evolving perceptual decisions and maintains a graded level of  
35 preparedness based on the quality of the incoming evidence (Gold & Shadlen 2000,  
36 Selen et al 2012). This sensorimotor transformation is particularly evident in the  
37 parietal and prefrontal association cortices, where neurons encoding the motor  
38 actions associated with the choices on offer also represent evolving decisions  
39 (Bollimunta & Ditterich 2011, de Lafuente et al 2015, Ding & Gold 2012, Kim &  
40 Shadlen 1999, Roitman & Shadlen 2002). Thus, perceptual decision making can be  
41 framed as a choice between available motor actions (Cisek 2007, Cisek & Kalaska  
42 2010, Shadlen et al 2008).

43 Yet, perceptual decisions do not feel like they are about potential actions but  
44 about propositions or stimulus properties. Indeed, one can make a decision without  
45 knowledge of the action that will be required to act on it. In such situations, one  
46 might expect neural circuits involved in motor planning to be irrelevant to the  
47 decision process (Gold & Shadlen 2003). However, it has been shown that even then,  
48 neurons in the parietal association areas carry a representation of the properties of  
49 the stimulus that will be relevant for future actions (Bennur & Gold 2011, Freedman  
50 & Assad 2006, Goodwin et al 2012). It is possible that such an ‘abstract’  
51 representations of decision relevant information— independent of the possible  
52 motor actions—coexist with representations of decisions as intended actions  
53 (Freedman & Assad 2011). Whether such simultaneous representations exist in the  
54 same association area has not been investigated before. Consequently, it is also not  
55 known if such abstract representations play a role in the decision-making process.

56 We used the random-dot motion (RDM) direction discrimination task  
57 (Newsome et al 1989) to investigate these questions. In this task, the animals  
58 discern the net direction of a stochastic motion stimulus and report their decision  
59 by making a saccade to one of two choice targets that is along the direction of the  
60 perceived motion. This task is particularly well suited for our purposes. First,  
61 optimal performance on this task demands integration of motion evidence over  
62 time. This prolonged deliberation time allows characterization of whether a neural  
63 population is participating in the process of evidence accumulation or not. Second,  
64 there exists a theoretical framework—bounded accumulation of noisy evidence to a  
65 decision threshold (aka drift-diffusion, Palmer et al 2005, Smith & Ratcliff 2004)—  
66 that accounts quantitatively for the speed and accuracy of decisions in this task.  
67 Third, it has been shown that responses of neurons in several areas of the brain  
68 involved in planning saccadic eye movements represent the evolving decision in this  
69 task (Ding & Gold 2010, Ding & Gold 2012, Horwitz & Newsome 1999, Kim &  
70 Shadlen 1999, Shadlen & Newsome 1996).

71 We focused on the parietal sensorimotor association area LIP. Many neurons  
72 in LIP respond to both the presence of a sensory stimulus in, and to a planned

73 saccade into their response fields (Barash et al 1991b). We recorded the responses  
74 of the same set of neurons during the RDM discrimination task in two configurations  
75 — when the response field contained the RDM stimulus and when it contained one  
76 of the choice targets. We show that the neurons represent the moment-by-moment  
77 accumulation of sensory evidence only in the latter configuration, that is, when they  
78 are involved in the planning of the motor action required to report the choice.

79  
80

## 81 **MATERIALS AND METHODS**

82 All training, surgery, and experimental procedures were conducted in  
83 accordance with the National Institutes of Health *Guide for Care and Use of*  
84 *Laboratory Animals* and were approved by the University of Washington  
85 Institutional Animal Care and Use Committee (IACUC Protocol # 2896-01).

86

### 87 **Experimental Design and Statistical Analysis**

#### 88 Neural recordings:

89 We recorded activity of 49 well isolated single units from area LIPv (Lewis &  
90 Van Essen 2000) of two adult female rhesus monkeys (*Macaca mulatta*) trained on  
91 the random-dot motion direction discrimination task. MRI was used to localize LIPv  
92 and to target recording electrodes. Within this putative LIPv, we screened for  
93 neurons that had both visual responses and spatially selective persistent activity.  
94 The persistent activity was assessed using a memory-guided saccade task (Gnadt &  
95 Andersen 1988). In this task, a target is flashed in the periphery while the monkey  
96 fixates on a central spot. The monkey has to remember the location of the target and  
97 execute a saccade to that location when instructed. The response field (RF) of each  
98 neuron was identified as the region of visual space that elicited the highest activity  
99 during the interval between the target flash and the eventual saccade. For the  
100 majority of neurons in LIPv, this region also elicits the strongest visual response  
101 (Platt & Glimcher 1998). During the recording sessions, visual and persistent  
102 activities were assessed qualitatively. We confirmed these properties by analyzing  
103 the following responses acquired during the experiment: (i) the response to RDM  
104 presented in the RF, 100-300 ms after onset and (ii) delay period activity, 100-300  
105 ms before a saccade into the RF. We confirmed that both proxies were greater than  
106 baseline activity, 0-200 ms before the appearance of a visual stimulus in the RF.

#### 107 Behavioral Task:

108 The choice-reaction time direction discrimination task is similar to previous  
109 studies (Roitman & Shadlen 2002). The animal initiates a trial by fixating on a point  
110 (fixation point; FP) presented on an otherwise black screen. Two choice-targets then  
111 appear on the screen. After a variable delay (drawn from an exponential distribution  
112 of mean 750 ms), the random-dot motion (RDM) stimulus is displayed in an  
113 imaginary aperture (i.e., invisible borders) of 5°-9° diameter at a third location. The  
114 first three frames of the stimulus consist of white dots randomly plotted at a density  
115 of 16.7 dots • deg<sup>-2</sup> • s<sup>-1</sup>. From the fourth frame, each dot from three frames before is  
116 replotted — either displaced in one direction along the axis connecting the two  
117 targets, or at a random location. The probability with which a dot is displaced in the

118 direction of one of the targets determines the stimulus strength (coherence) and on  
119 each trial, this was randomly chosen from the set  $C = [0, 0.032, 0.064, 0.128, 0.256,$   
120  $0.512]$ . The motion strengths and the two directions were randomly interleaved.  
121 Importantly, the monkey was allowed to view the stimulus as long as it wanted and  
122 indicate the perceived direction of motion with a saccade to the target that lay in  
123 that direction to obtain a liquid reward. Rewards were given randomly ( $p=0.5$ ) for  
124 the 0% coherence motion condition.

125 During recording from each isolated neuron, the choice-targets and the RDM  
126 were presented in two configurations (Figure 1). In the ‘Target-in-RF’ configuration,  
127 one of the choice-targets overlay the neuronal RF. In the ‘RDM-in-RF’ configuration,  
128 the RDM stimulus was presented in the RF. The two configurations were alternated  
129 in blocks (median block size 90, IQR 60-120). The order of blocks was randomized  
130 across neurons (23 started with Target-in-RF blocks; 26 with RDM-in-RF blocks)  
131 and each neuron was recorded with at least one block of trials in each configuration.  
132 For 33 of the neurons, the targets and the dot stimuli were placed  $120^\circ$  apart on an  
133 imaginary circle (as shown in Figure 1). For the remaining 16 neurons (in one  
134 monkey), the targets and the dot stimulus were aligned linearly in both  
135 configurations. Since the directions of motion varied across sessions, we adopted  
136 the following conventions. In the Target-in-RF configuration, the direction of motion  
137 towards the target in the RF for each neuron was considered the ‘positive’ direction.  
138 In the RDM-in-RF configuration, the positive direction was assigned *post hoc* from  
139 the neural recordings: the direction of motion that elicited the higher mean  
140 response.

141 All statistical tests are described in the pertinent sections of Materials and  
142 Methods.

143

#### 144 **Analyses of behavioral data**

145 The accuracy and reaction times (RT) of the monkeys were fit by a bounded  
146 evidence accumulation model (Shadlen et al 2006). In the parsimonious application  
147 of this model employed here, the instantaneous evidence about motion at each time  
148 step is assumed to arise from a normal distribution with variance  $\Delta t$  and mean  
149  $\kappa(C - C_0)\Delta t$ , where  $C$  is the signed motion coherence,  $C_0$  is a bias, and  $\kappa$ , a scaling  
150 parameter. This instantaneous evidence is accumulated over time and the decision  
151 process terminates when the accumulated evidence reaches one of the bounds  $\pm B$   
152 leading to the choice of one of the targets. The mean RT is the expectation of the  
153 time taken for the accumulated evidence to reach the bound plus a constant — the  
154 non-decision time  $t_{nd}$  comprising sensory and motor delays. To account for  
155 asymmetric reaction times in some configurations, we used two different non-  
156 decision times ( $t_{nd1}$  and  $t_{nd2}$ ) for the two target choices. In this framework, the mean  
157 RT for the correct choices (i.e. choices consistent with the sign of the drift rate,  
158  $\kappa[C - C_0]$ ) is described by

159

$$160 \quad RT = \frac{B}{\kappa(C - C_0)} \tanh(\kappa(C - C_0)B) + t_{nd} \quad (1)$$

161

162 Further, the choice distributions are described by

163

164

$$P_+ = [1 + \exp(-2\kappa(C - C_0)B)]^{-1} \quad (2)$$

165

166 where  $P_+$  is the probability of choosing the target consistent with the ‘positive’  
167 direction of motion. We fit Equation 1 to the RT data and used the fitted parameters  
168 to predict the choice functions (Equation 2) (Gold & Shadlen 2002, Kang et al 2017).  
169 We first established an estimate of  $C_0$  from a logistic fit of the choices. Because the  
170 parsimonious model explains only the RT when the choice is consistent with the  
171 sign of the drift rate (Ratcliff & Rouder 1998), we used the mean RT for positive  
172 choices at  $C - C_0 > 0$  and negative choices for  $C - C_0 < 0$ . We then fit  $\kappa$ ,  $B$ ,  $t_{nd1}$  and  $t_{nd2}$  and  
173 used the values of  $\kappa$  and  $B$  in Equation 2 to establish predictions of choice (Figure 2).

174

175 We evaluated the fidelity of these predictions by comparing the predictions  
176 to a logistic regression fit of the choice data. To demonstrate that these predictions  
177 were not a trivial result of monotonic ordering of RTs by motion strength, we  
178 compared them to predictions from 10,000 pseudorandomly generated RT vs.  
179 coherence functions that preserved the order of RTs. To generate these functions,  
180 we retained the observed RTs for the minimum (-51.2%), maximum (+51.2%) and  
181 0% coherences and used ordered random values within this range for the other  
182 coherences. We quantified the magnitude of the perturbation as the average of the  
183 percentage change from the observed RT at each coherence. We then performed the  
184 steps above to fit these perturbed RTs to establish a new predicted choice function.  
185 We estimated the probability of obtaining a predicted choice function as good or  
186 better than the ones derived from data as a function of the size of the perturbation.  
187 We report the minimal perturbation at which  $p < 0.01$ .

188

189 To obtain a more precise estimate of decision times, we fit an elaborated  
190 version of the bounded evidence accumulation model (Extended data Figure 2-1)  
191 simultaneously to both choices and reaction times (including both correct and error  
192 trials). In this model, the decision bounds ( $B$ ) collapse with time ( $t$ ) such that

193

$$B(t) = B_0 - B_1(t - B_{del})^2 \quad \text{for } t > B_{del} \quad (3)$$

194

195 where  $B_0$  is initial bound height,  $B_1$  is the rate of collapse and  $B_{del}$ , the delay to onset  
196 of collapse. The non-decision time is modeled as a normal distribution with mean  $t_{nd}$   
197 and standard deviation  $\sigma_{tnd}$ . A separate non-decision time was used for decisions  
198 terminating at each of the two bounds. This model was fit by maximizing the log  
199 likelihood of the observed responses (choice and RT) on each trial to numerical  
200 solutions for the probability densities of terminating at  $\pm B(t)$  (Churchland et al  
201 2008, Kang et al 2017). The mean decision times were obtained from these fits and  
202 their standard error estimated from fitting the model to resampled trials (i.e., the  
203 standard deviation of the means from 100 iterations).

204

### 204 **Analyses of neural data**

205

206 Population responses were computed as the average of all trials from all  
207 neurons after smoothing each trial with a 75 ms wide boxcar filter (Figure 3A-D).  
208 The smoothing was only for visualization and all analyses were conducted on the  
raw spike data (1 ms resolution). To visualize the coherence dependent buildup of

209 activity (Insets of Figure 3A,C), we detrended individual neuronal responses by  
210 subtracting the average responses across all coherences for the same neuron  
211 (separately for each task configuration).

212 We compared the strength of direction selectivity in our neural population to  
213 that reported in Fanini and Assad (2009), using their direction selectivity index (DI):  
214

$$215 \quad DI = \frac{|\sum_n R_n e^{i\theta_n}|}{\sum_n R_n} \quad (4)$$

216  
217 where  $R_n$  is the mean response to  $n^{\text{th}}$  direction  $\theta_n$  in the time window 190 ms  
218 after RDM onset to 100 ms before saccade. DI was computed from responses to the  
219 51.2% coherence motion trials in the two directions ( $\pi$  radians apart). We  
220 compared the distribution of the DI values in our population to those reported in  
221 Figure 3A of Fanini and Assad (2009), using a rank sum test (Figure 3E).

222 We used responses at the two strongest motion strengths ( $\pm 51.2\%$   
223 coherence) to estimate the latency from motion onset to the time that direction  
224 selectivity was first apparent in a given neural population (Figure 3F). We averaged  
225 the responses in 40 ms bins on each trial at these coherences and derived receiver  
226 operating characteristics (ROC) from these response distributions at each time bin.  
227 The area under the ROC denotes the probability of the neuron responding more to  
228 the positive direction of motion. For each time bin, we applied a Wilcoxon rank sum  
229 test and estimated the response latency as the first of three successive bins that met  
230 statistical significance ( $p < 0.05$ ). We used a bootstrap procedure to estimate the  
231 distribution of latencies under the two task configurations. For each configuration,  
232 we resampled trials with replacement, matching the number of trials in the original  
233 data sets, and obtained a latency using the same procedure as on the actual data. We  
234 repeated this procedure 1000 times for each configuration. The medians of these  
235 distributions recapitulated the latency estimated from the data (180 and 190 ms for  
236 the Target-in-RF and RDM-in-RF respectively). We report the p-value of a rank sum  
237 test (2-tailed) using the bootstrap derived distributions to evaluate the null  
238 hypothesis that the latencies are the same for the two configurations. We obtained  
239 the same result by sampling neurons (instead of trials), with replacement.

240 We quantified the effect of motion strength on the rate of increase of neural  
241 response ('buildup rate') during the decision-making epoch as the slope of the  
242 response in the time window 180 to 380 ms after stimulus onset (Figure 3G). The  
243 start of the time window was chosen based on the latency of the direction selectivity  
244 of the responses. To exclude pre-saccadic activity, we discarded from each trial, the  
245 spikes occurring up to 100 ms before saccade onset. We computed by least squares  
246 method, the slope for each neuron at each coherence from the mean detrended  
247 response in 10 ms time bins in the aforementioned time window. We then tested  
248 whether these buildup rates scaled with coherence across the population in each  
249 stimulus configuration by fitting a linear model regressing these buildup rates  
250 against signed coherence. We confirmed that the trends shown in Figure 3G were  
251 preserved when the analysis was performed using weighted regression.  
252

253 Leverage of neural activity on behavior: (Figure 4)

254 We measured the leverage of neural activity on the animal's choice in two  
255 ways. First, we fit the monkey's choices with logistic regression

256  
257 
$$P_+ = [1 + \exp -(\beta_0 + \beta_1 C + \beta_2 R)]^{-1} \quad (5)$$

258  
259 where  $P_+$  is the probability of choosing the 'positive' direction target,  $C$  is signed  
260 coherence and  $R$  is the z-scored mean neural response in the time window 100 to  
261 300 ms before saccade. If the variations in firing rate of the neurons have leverage  
262 over choice even when the effect of motion coherence is accounted for, then  $\beta_2 \neq 0$ .  
263 We compared  $\beta_2$  across configurations with a signed rank test on their absolute  
264 values. We also quantified the additional leverage of the neural responses on choice  
265 beyond that of the motion strength, by measuring the difference in the deviance of  
266 the full model and the model without the  $R$  term ( $\Delta$ ). Comparisons of  $\Delta$  provided  
267 similar results to the comparisons of the  $\beta_2$  term that are presented in the results.

268 Second, we quantified the trial-by-trial correlations between neuronal  
269 response and the animal's choice in the 0% coherence trials by computing 'choice  
270 probability' (CP, Britten et al 1996). For each neuron, we computed the mean  
271 responses on the 0% coherence trials in a time window 100 to 300 ms preceding the  
272 saccade. The trials were separated into two groups based on the animal's choice. We  
273 used the distributions of responses from the two groups to calculate the area under  
274 the ROC, termed the choice probability. We evaluated the null hypothesis that  $|\text{CP}-$   
275  $0.5|=0$  using a permutation test. We permuted the union of responses from both  
276 groups and assigned them randomly to the two choices (matching the number of  
277 trials in each group) and computed the CP. By repeating this procedure 2000 times,  
278 we established the distribution of  $|\text{CP}-0.5|$  under  $H_0$  and report the  $p$  value as the  
279 area to the right of the observed CP minus 0.5.

280 To evaluate whether the CPs from the two configurations were different, we  
281 first converted responses to z-scores (by neuron and configuration) and then  
282 combined the z-scores across neurons. We then computed two CPs, as above, for the  
283 two configurations. To evaluate the null hypothesis that the two CPs are equal, we  
284 performed another permutation test, this time preserving the association with  
285 choice but permuting the association with configuration. We obtained the  
286 distribution of the difference in CP ( $|\Delta\text{CP}|$ ) under  $H_0$  from 2000 repetitions of the  
287 permutation procedure and report the  $p$  value as the area of this distribution that is  
288 greater than the observed  $|\Delta\text{CP}|$  from the data.

289 We also quantified the correlation between the buildup rates and RT. We  
290 used trials in which the monkey chose the 'positive' direction target, including all  
291 such trials at 0% motion strength and only correct trials at positive motion  
292 strengths. For each trial, we computed the slope of the response between 180-420  
293 ms after RDM onset (using 40 ms time bins) from the detrended responses. To  
294 remove the effect of coherence on RT, we standardized (i.e., z-scored) both the RTs  
295 and the buildup rates within each coherence and computed the correlation between  
296 them.

297



298 Variance and correlation analysis:

299 To evaluate if the neuronal firing rates on individual trials during the  
300 decision-making epoch reflect a process of accumulation of noisy evidence, we  
301 analyzed the pattern of variance and autocorrelation of the responses (Churchland  
302 et al 2011, de Lafuente et al 2015). We were interested in the variance attributable  
303 to such an accumulation process. For the  $i^{\text{th}}$  time bin, this variance ( $s_{<N_i>}^2$ ) is the  
304 fraction of the total measured variance ( $s_{N_i}^2$ ) remaining after accounting for the  
305 point process variance (PPV), that is, the variance expected even if the underlying  
306 rates were constant. We refer to  $s_{<N_i>}^2$ , which is a variance of a conditional  
307 expectation of the counts, hence the variance of the underlying rate, simply as  
308 ‘variance’ in the main text. Assuming the PPV is proportional to the mean count,

309  
310 
$$s_{<N_i>}^2 = s_{N_i}^2 - \varphi < N_i > \quad (6)$$

311  
312 where  $\varphi$  is a constant that must be estimated.

313 Since our goal was to compare how well the firing rates conform to a  
314 diffusion process, we allowed  $\varphi$  to be a free parameter and fit it to obtain the best  
315 conformity to the autocorrelation pattern for a running sum of independent,  
316 identically distributed random numbers. Recall that the variance of the sum of  $n$   
317 independent random samples of variance  $\sigma^2$  is  $n\sigma^2$ . If the sum is extended for  
318 another  $m$  samples, the variance is  $(n+m)\sigma^2$ . The sum out to  $n$  shares a fraction of  
319 this variance:  $n/(n+m)$ . This is the  $R^2$ , and its square root is the correlation,  $\rho$ . So, for  
320 an unbounded diffusion process, the correlation between the  $i^{\text{th}}$  and  $j^{\text{th}}$  time steps is

321 
$$\rho_{ij} = \sqrt{\frac{\min(i,j)}{\max(i,j)}} \quad (7)$$

322 Note that for six time bins, the 6 by 6 correlation matrix contains 15 unique values  
323 of  $\rho_{i \neq j}$ .

324 We characterized the variance and autocorrelation from six 60 ms time bins  
325 between 180-540 ms after stimulus onset, ignoring any time bins that extended to  
326 within 100 ms of the saccade. To pool data across neurons, we used the residuals for  
327 each trial as follows. The mean response of a trial in each time bin was subtracted  
328 from the mean of the responses from all the trials for that neuron for the same  
329 signed coherence in that time bin. We computed the covariance matrix from the  
330 residuals for the six time bins.

331 We used an initial guess for  $\varphi$  to calculate the variance attributable to the  
332 diffusion process ( $s_{<N_i>}^2$ , Equation 6) and substituted the raw variances for the  
333 diagonal of the covariance matrix. The correlation was derived from this covariance  
334 matrix by dividing each term by  $\sqrt{(s_{<N_i>}^2 s_{<N_j>}^2)}$ . We used Nelder-Mead simplex  
335 method (MATLAB function ‘*fminsearch*’) to find the  $\varphi$  that minimized the sum of  
336 squares of the difference between the 15 z-transformed calculated correlation ( $r_{ij}$ )  
337 and the z-transformed theoretically predicted correlation ( $\rho_{ij}$ ). Note that the values  
338 of  $\varphi$  were not constrained to be the same in the Target-in-RF ( $\varphi = 0.42$ ) and RDM-in-  
339 RF ( $\varphi = 0.39$ ) configurations.

340 We report the variance ( $s_{<N_i>}^2$ ) in Figure 5 using the fitted  $\varphi$  values and  
341 estimated the standard errors from a bootstrap. We evaluated the effect of time on  
342 the variance using least squares regression. We also performed these analyses over  
343 a range of plausible values of  $\varphi$  and confirmed that only the absolute values of the  
344 variances differed, whereas the shape of the variance function over time was  
345 unaffected. We similarly computed the variance and its standard error for time bins  
346 aligned to the onset of the saccade.

347 We used a combination of Monte Carlo methods and parametric statistical  
348 tests to analyze the decline in variance preceding the saccade. For trials in which the  
349 monkey chose the target in the RF, we compared the variance in the two time bins  
350 immediately preceding the saccade, using the bootstrap derived standard errors.  
351 We report a t-test. We made the same comparison for each of the other conditions:  
352 (1) unchosen Target-in-RF, (2) preferred direction choice with RDM-in-RF, and (3)  
353 non-preferred direction choice with RDM-in-RF. None were significant ( $p>0.05$ ). We  
354 do not report these tests in the results and instead compare directly the estimates of  
355 variance decline in the four conditions. To do this, we computed the fractional  
356 difference in variance in the two time bins and estimated its standard error using  
357 the same bootstrap. We compared this difference statistic in the four conditions  
358 using ANOVA. We report the maximum  $p$  value for the comparison of the chosen  
359 Target-in-RF condition with the other three conditions, using Tukey's test.

360 To quantify how well the measured correlation values conform to theoretical  
361 predictions, we formed a sum of square (SS) statistic from the 15 pairs of observed  
362 and theoretical correlations (after Fisher-z transformation, Figure 6D-E). We used a  
363 bootstrap procedure to estimate the distribution of this statistic by sampling with  
364 replacement from the data and following the steps above (100 iterations). We used  
365 a Kolmogorov-Smirnov test to determine the significance of the difference between  
366 the distribution of the SS statistics between the RDM-in-RF and the Target-in-RF  
367 configurations.

368

## 369 **Model**

370 We simulated the spike rates of three neural populations during the RDM  
371 epoch — one population with the RDM in their RF and two with targets in their RF.  
372 We devised two models that could account for direction selectivity seen in the RDM-  
373 in-RF population: (1) selectivity is inherited by means of divisive suppression from  
374 the Target-in-RF populations that are accumulating evidence ('divisive suppression  
375 model'), and (2) selectivity arises from an evidence accumulation process  
376 transpiring in the RDM-in-RF population itself ('parallel diffusion model'). Each  
377 model was implemented in two stages. In the first stage, our goal was to  
378 approximate the pattern of mean responses seen in the data. The models specify the  
379 predicted autocorrelation matrices for both neural populations. In the second stage,  
380 we compared the two models by assessing their capacity to explain the  
381 autocorrelation matrices derived from the neural data.

382 In the divisive suppression model (Figure 7A), the RDM-in-RF population  
383 was modeled as having an exponential rise in firing rate starting 50 ms after RDM  
384 onset and peaking at 130 ms (Figure 7C). The peak response varied from trial to

385 trial, independent of RDM direction. The population then maintained the peak  
386 response through the end of the simulated epoch (540 ms after RDM onset). The  
387 two Target-in-RF populations were modeled as maintaining a steady response ( $R_0$ )  
388 up to 180 ms after RDM onset and then following drift diffusion dynamics (Figure  
389 7B). The responses  $S$  in the dynamic epoch evolved at each time step  $\Delta t$  as

$$390 \Delta S = K\Delta t + N\{0, \alpha\sqrt{\Delta t}\} \quad (8)$$

391  
392 incorporating a deterministic drift component ( $K$ ) and a diffusion component ( $N$ ) —  
393 a Normally distributed random number with mean zero and standard deviation  
394  $\alpha\sqrt{\Delta t}$ . The drift component was positive for one target population ( $T_1$ ) and negative  
395 for the other ( $T_2$ ). The parameter  $K$  was chosen so that the drift rate in the  $T_1$   
396 population of the model after implementation of divisive suppression (see below,  
397 Equation 9) matched the observed buildup of the neural response for the Target-in-  
398 RF neural population at the 25.6% coherence condition (solid line in Figure 7F). The  
399 parameter  $\alpha$  was chosen such that the slope of the variance, after incorporation of  
400 suppression, mimicked that seen in data (blue curve in Figure 5A). See Table 2 for  
401 values of model parameters.

402  
403 We simulated 10,000 trials and implemented divisive suppression between  
404 the three populations of the form

$$405 \quad 406 R_1 = \frac{R'_1(t)}{1 + \omega_{21}R'_2(t - \Delta t) + \omega_{31}R'_3(t - \Delta t)} \quad (9)$$

407  
408 where  $R'$  and  $R$  denote the unsuppressed and suppressed responses, respectively, of  
409 the population indicated by the subscript, and  $\omega_{ij}$  is the weight of the influence of  
410 the  $i^{\text{th}}$  population on the  $j^{\text{th}}$ . The suppressed responses at each time point ( $t$ ) was  
411 computed based on the unsuppressed responses in the time window preceding it by  
412  $\Delta t = 10\text{ms}$ .

413 We first estimated the suppression of two target populations on each other  
414 ( $\omega_{T_1T_2}$  and  $\omega_{T_2T_1}$ ) from the peak and steady state responses of the neurons to the  
415 appearance of a target in their RF. We then estimated the weight of suppressive  
416 influence of the RDM-in-RF population on the Target-in-RF populations ( $\omega_{DT_x}$ ,  $x \in$   
417  $\{1,2\}$ ) using the firing rates at the trough of the response dip following the onset of  
418 RDM (arrow in Figure 7F). The influences of the two Target-in-RF populations on  
419 the RDM-in-RF population  $\omega_{T_xD}$  were adjusted around  $\omega_{DT_x}$  to mimic the observed  
420 separation in mean responses of the RDM-in-RF population to the two directions of  
421 motion. Such asymmetry of the influence of the two Target-in-RF populations might  
422 arise from the different spatial relationship they might have with the RDM-in-RF  
423 population. Similar asymmetries are likely for the other pairs of  $\omega$  too, but we set  
424 them to be equal here to simplify the model. We used the weights of suppression to  
425 estimate the underlying unsuppressed mean responses of each of the populations  
426 (Figure 7B-C).

427 In the parallel diffusion model, we implemented drift diffusion dynamics in  
428 the RDM-in-RF population as well as in the Target-in-RF population, and the

429 populations had no suppressive interactions (Figure 9). The drift component in the  
430 RDM-in-RF population ( $K$  in Equation 8) was set to mimic the observed separation  
431 of responses to the two directions of motion in the data (Figure 7G). The scaling  
432 factor for the variance of the diffusion component ( $\alpha$  in Equation 8) was adjusted to  
433 mimic the observed slope of the variance of the responses in the RDM-in-RF  
434 configuration (green curve in Figure 5A). Because of the absence of divisive  
435 interactions in this model,  $K$  and  $\alpha$  for the Target-in-RF populations were  
436 recomputed to bring them in agreement with the data (Table 2).

437 Up to here, all parameters were established from the neural data, allowing  
438 both models to approximate the mean responses in the data. To compare how well  
439 the two models can account for the pattern of autocorrelation in the data, we  
440 needed to consider other possible sources of variance and autocorrelation. In both  
441 models, the variance of the non-directional sensory response of the RDM-in-RF  
442 populations was incorporated as a free parameter  $V_{RDM}$ . This parameter was  
443 constrained to not exceed the variance observed at the peak of the sensory neural  
444 response in the RDM-in-RF configuration. For the divisive suppression model, our  
445 hypothesis is that the noisiness of the suppression causes the autocorrelation  
446 pattern of the RDM-in-RF population to deviate from theoretical predictions. We  
447 instantiated this noisy process by corrupting the interaction signals so that they  
448 were not perfect replicas of the responses of the three populations in the model  
449 (Insets in Figure 7B, C). This noise term was proportional to the square root of the  
450 response. We set the scaling term  $\gamma=5$  to represent a modest amount of noise ( $R^2=$   
451  $0.81$  for the diffusion paths and their corrupted versions).

452 We attempted to achieve the best possible fit to the 30 correlations observed  
453 in the data in the two configurations (15 unique values each for the Target-in-RF  
454 and RDM-in-RF configuration) under each of the models. The models give rise to  
455 predicted correlations in the Target-in-RF and RDM-in-RF populations (varying with  
456 the free parameter  $V_{RDM}$ ). As above, we allow for uncertainty in the PPV in the data  
457 ( $\varphi$  in Equation 6). So we compute the correlations in the neural data with two  
458 additional degrees of freedom (parameters,  $\varphi_{RDM}$  and  $\varphi_{Tar}$  for the RDM-in-RF and  
459 Target-in-RF configurations, respectively). We estimated the set of parameters that  
460 maximized the log likelihood ( $\hat{L}$ ) of the 30 correlations in the data (Fisher  $z$ -  
461 transformed) under the model predictions. It was not possible to fit  $\gamma$  and  $\varphi_{RDM}$   
462 simultaneously without imposing additional constraints (e.g.,  $\varphi_{RDM}=\varphi_{Tar}$ ). Instead,  
463 we fixed  $\gamma$  to establish a modest perturbation of the interaction signals, as noted  
464 above. This is the model illustrated in Figures 7-8 (parameters in Table 2). We  
465 compared models using the difference in Bayesian Information Criterion ( $BIC =$   
466  $-2\hat{L} + k \ln(n)$ , where  $k$  is the number of free parameters and  $n$  is the number of  
467 data points). We explored a range of  $\gamma$ , to confirm that the suppression model is  
468 favored even with subtle noise perturbation (e.g.,  $\Delta BIC > 100$  for  $\gamma=1$ ,  $R^2= 0.99$ ). BICs  
469 were calculated by conservatively assuming 4 degrees of freedom (d.f.) for the  
470 divisive suppression model  $\{\varphi_{RDM}, \varphi_{Tar}, \gamma, V_{RDM}\}$  and just two d.f. for the parallel  
471 diffusion model  $\{\varphi_{RDM}, \varphi_{Tar}\}$  because  $\gamma$  should be regarded as a free parameter and  
472 the best fit of the parallel diffusion model assigns  $V_{RDM} \approx 0$ . We also fit to a model  
473 with  $\gamma$  as a free parameter under the constraint  $\varphi_{RDM}=\varphi_{Tar}$ . This implementation also

474 favors the suppressive interaction model ( $\Delta\text{BIC} > 6 \times 10^3$ ; best fitting  $\gamma = 8.2$ ). Note that  
475 the implementation of  $V_{RDM}$  introduces autocorrelation of the rate that spans the  
476 duration of the analysis epoch (360 ms). Parametrization of the sensory responses  
477 with exponentially decreasing autocorrelation did not provide a significantly better  
478 fit to the data in either model.

479

## 480 RESULTS

481

482 We recorded from 49 well isolated single neurons in area LIP from two  
483 monkeys (28 neurons from monkey N and 21 neurons from monkey B) as they  
484 decided the net direction of a noisy random-dot motion (RDM) stimulus. On each  
485 trial, two choice targets indicated the two directions to be discriminated (e.g., up vs.  
486 down). The monkeys reported their decision by making a saccade to the choice  
487 target along the perceived direction of motion. They were free to indicate their  
488 decision whenever ready, thus providing a measure of reaction time (RT). The  
489 monkeys performed the task with the RDM and the targets arranged in two  
490 configurations (Figure 1). In the ‘*Target-in-RF*’ configuration, one of the choice  
491 targets was placed in the response field (RF) of the neuron under study. In the ‘*RDM-*  
492 *in-RF*’ configuration, the RDM was placed in the RF. In this way, we obtained data  
493 from the same LIP neuron when it belonged either to the pool representing the RDM  
494 stimulus or to one of the two pools representing the choice targets.

495 We first establish that the animals integrate motion information over 100s of  
496 ms to make their choices in both task configurations. This prolonged deliberation  
497 time offers a window in which to interrogate how the neural responses relate to the  
498 process of decision formation. We show that the firing rates of neurons represent  
499 the state of the accumulated evidence only when the neurons belong to a pool  
500 representing the targets.

501

### 502 Behavior in the two task configurations

503 The behavior of both monkeys exhibited an orderly dependence on the  
504 strength of the RDM in both task configurations. They took longer to report their  
505 decision when the motion strength was weaker (Figure 2, A-D), and their decisions  
506 were less accurate (Figure 2, E-H). The systematic relationship between reaction  
507 time (RT) and accuracy is well described by the accumulation of noisy evidence to a  
508 threshold, which determines both the time it takes to make a decision and which  
509 alternative the monkey chooses (Gold & Shadlen 2002, Smith & Ratcliff 2004). We  
510 support this assertion by fitting the RTs to a bounded evidence accumulation model  
511 and then using the fitted parameters to predict the choices (Kang et al 2017, Shadlen  
512 & Kiani 2013). Specifically, the curves in the top row of Figure 2 are fits to a  
513 parsimonious symmetrically bounded drift diffusion model, which uses four  
514 parameters to account for the effect of motion strength on the mean RT for correct  
515 choices (Equation 1; see Methods). Two of the parameters—the bound height,  $\pm B$ ,  
516 and the sensitivity coefficient,  $\kappa$ —establish predictions for the proportion of choices  
517 as a function of motion strength (Equation 2). The dashed curves in the lower panels  
518 of Figure 2 depict these predictions. They are only slightly worse than logistic fits to

519 the choice data themselves (gray curves), which are unconstrained by RT. To  
520 quantify the “goodness of prediction”, we compared the model predictions to those  
521 obtained from random perturbations of the mean RTs which preserve their orderly  
522 dependence on motion strength. Small perturbations of the RT (mean 7.5%, range 1-  
523 12% or equivalently, mean 48 ms, range 7-73 ms) are sufficient to produce  
524 substantially poorer predictions ( $p < 0.01$ ). The fidelity of the predictions supports  
525 the assertion that the choices result from the same process of bounded evidence  
526 accumulation that explains the decision times. Importantly, this conclusion holds for  
527 both stimulus configurations.

528 From this exercise we conclude that the decision times (i.e., RT minus the  
529 non-decision time) estimated from diffusion model fits can be used to identify an  
530 epoch in which noisy evidence was integrated to make the decision. To obtain more  
531 refined estimates of the integration times for the different task configurations, we fit  
532 a more elaborate bounded diffusion model (Figure 2-Extended data Figure 1, see  
533 Methods for details and Table 1 for fit parameters). The small differences in reaction  
534 times between the two configurations for Monkey N was accounted for by the non-  
535 decision time parameter. For Monkey B, a combination of increased sensitivity and  
536 decreased bound height contributed to the faster RTs in the RDM-in-RF  
537 configuration. Importantly, the fits established that both monkeys integrated  
538 evidence over hundreds of ms in each configuration.

539

#### 540 **LIP neuronal responses in the two task configurations**

541 Neurons in area LIP can exhibit sensory-, memory- and saccade-related  
542 responses (Barash et al 1991a, Gnadt & Andersen 1988). For example, in a task  
543 where a monkey must remember a visually cued location and make a delayed  
544 saccade to it, LIP neurons can show (1) a short latency response to the visual cue if it  
545 appears in the RF, (2) a persistently elevated response during the delay period and  
546 (3) a burst of activity preceding a saccade to the remembered location. Not all LIP  
547 neurons exhibit all three types of responses. Since our goal was to compare the  
548 decision related activity in the same neurons when they belonged to the pool  
549 representing the sensory information and when they belonged to the pool involved  
550 in planning the motor action, we recorded from neurons that responded to visual  
551 stimuli in their RF and also showed persistent activity in association with saccadic  
552 motor planning. Each of our neurons increased their responses above baseline to  
553 the appearance of a visual stimulus in their RF (responses after RDM onset: median  
554 5 SD above baseline, interquartile range [IQR]: 2.7 to 7.7). The strength of this  
555 sensory response was comparable to the highest responses observed during the  
556 delay period (median 4.3 SD above baseline, IQR: 2.3 to 9.2,  $p = 0.49$ , Kolmogorov-  
557 Smirnov test).

558 During the direction discrimination epoch, the pattern of activity of the  
559 recorded neurons varied according to which pool they belonged to. When the  
560 neurons belonged to a pool with one of the targets in the RF, the responses largely  
561 recapitulated observations from earlier reports (e.g. Churchland et al 2008, Roitman  
562 & Shadlen 2002). Figure 3 shows the average population response of all neurons in  
563 the Target-in-RF configuration, aligned to either the onset of RDM (Figure 3A) or to  
564 the saccade (Figure 3B). The response was elevated before the onset of the RDM

565 reflecting the presence of a choice target in the RF of the neurons. Following motion  
566 onset, there was a stereotyped dip in activity before the responses began to  
567 separate by motion strength. The evolution, beginning ~180 ms after stimulus  
568 onset, is best appreciated in the de-trended responses (Figure 3A, inset). These  
569 features and those next described were evident in both of the monkeys, shown  
570 individually in Figure 3-Extended data Figure 1 and 2.

571 The same neurons also exhibited differential responses to the two directions  
572 of motion being discriminated when they belonged to the pool representing the  
573 RDM. To combine responses across the population in this task configuration, we  
574 identified the preferred direction of motion for each neuron as the one that elicited  
575 the greater response. Figure 3C-D shows the responses of the population averaged  
576 after sorting by each neuron's preferred direction. After an initial rise in activity due  
577 to the appearance of the RDM in the RF, the responses exhibited a direction  
578 dependent separation. Such modulation of LIP neuronal responses by motion  
579 direction has been previously reported in naïve monkeys (Fanini & Assad 2009).  
580 However, the direction dependent modulation was slightly stronger in our neural  
581 population (median direction selectivity index: 0.11 and 0.09, respectively for our  
582 neurons and those reported in Fanini & Assad;  $p=0.06$  rank-sum test; see Figure 3E).  
583 Note that, our neural population displays this degree of direction selectivity at a  
584 lower motion strength (51.2% coherence) than that used by Fanini & Assad (100%  
585 coherence). This result is consistent with previous reports of stronger directional  
586 selectivity in LIP neurons of monkeys trained on tasks that rely on direction  
587 discrimination (Sarma et al 2015).

588 We quantified the time course of the evolution of direction selectivity at the  
589 highest motion strength (Figure 3F) using an ROC metric (see Methods). The  
590 responses to the two motion directions were significantly different starting 190 ms  
591 after the onset of dot stimulus ( $p<0.05$  on Wilcoxon rank sum test). This is much  
592 later than the ~50 ms latency of direction selectivity observed in naïve monkeys  
593 (Fanini & Assad 2009). This is also later than the ~100 ms latency for direction  
594 category selectivity reported in monkeys trained to categorize sets of motion  
595 directions (Swaminathan & Freedman 2012). As discussed below, the long latency in  
596 our neuronal pool may be an indication that the directional responses we observed  
597 in the RDM-in-RF configuration arise through a different mechanism than the  
598 direction- and category-selective responses previously reported in LIP.

599 The latency in the RDM-in-RF configuration lagged the direction selectivity  
600 seen in the same neurons in the Target-in-RF configuration (180 ms,  $p<10^{-3}$ ,  
601 bootstrap analysis). However, the similarity of the latencies suggests that the RDM-  
602 in-RF population might also reflect the formation of the decision, as the Target-in-RF  
603 population has been shown to do (Churchland et al 2008, Roitman & Shadlen 2002).  
604 Consistent with this possibility, the rise and decline of neural activity depends on  
605 the strength of the RDM (Figure 3C, inset), albeit with a smaller dynamic range  
606 compared to responses in the Target-in-RF configuration. Note that in this  
607 configuration, directions are sorted based on the preferred direction of each neuron.  
608 The coherence dependent ordering of responses could have been accentuated by  
609 this *post hoc* procedure. To quantify this coherence dependence, for each neuron  
610 and motion strength, we estimated the slope of the responses (buildup rate) in a

611 200 ms epoch beginning at the time of response separation as identified in the  
612 preceding analysis. We then characterized the relationship between motion  
613 strength and buildup rates separately for the preferred and non-preferred  
614 directions of motion (Figure 3G). The buildup rates of neurons in the Target-in-RF  
615 configuration showed a linear dependence on motion strength both when the  
616 motion direction was towards the RF ( $1.5 \pm 0.2$  spikes per  $s^2$  per 1% coherence,  
617  $p < 10^{-9}$ ) and when the motion was away from the RF ( $-1.2 \pm 0.2$ ,  $p < 10^{-5}$ ). A similar  
618 trend was observed in the RDM-in-RF configuration. However, this relationship was  
619 significant only for the non-preferred direction of motion ( $-0.7 \pm 0.2$  spikes per  $s^2$  per  
620 1% coherence,  $p < 0.002$ ). For the preferred direction, the build-up rates increased  
621 with coherence but not significantly so ( $0.6 \pm 0.4$  spikes per  $s^2$  per 1% coherence,  
622  $p = 0.13$ ). In both configurations, these trends were preserved even when the highest  
623 motion strength trials were excluded. Thus, neuronal pools in LIP representing the  
624 saccade targets and the RDM both differentiate the discriminanda during an epoch  
625 coinciding with decision formation. The build-up of neural activity depended on the  
626 strength of the stimulus in both populations, but this dependence was weaker when  
627 the RDM was in the RF.

628 We also compared the responses at the end of the decision process for the  
629 two task configurations (Figure 3B & D). When the monkey chose the target in the  
630 neuron's RF, the responses appear to coalesce to a common firing rate just before  
631 the saccade, irrespective of motion strength (Figure 3B, solid curves), as shown  
632 previously (Churchland et al 2008, Roitman & Shadlen 2002). This pattern is  
633 thought to reflect a threshold level detected by another circuit to terminate the  
634 decision (Hanes & Schall 1996, Hanks et al 2014, Mazurek et al 2003). When the  
635 same neurons contained the RDM in their RF, the responses to the different  
636 coherences remained separated until the saccade, and this held for either choice  
637 (Figure 3D). This was also the case when the RF contained the unchosen target  
638 (Figure 3B, dashed curves). Thus, only the responses of the pool representing the  
639 target chosen by the animal contains a possible neural signature of decision  
640 termination. In the ensuing sections, we support this qualitative observation with  
641 other lines of evidence that show that this pool alone signals decision termination  
642 and the time taken to reach it.

643

### 644 **Correlation between neural responses and behavior**

645 We examined whether the neural responses in the two stimulus  
646 configurations were predictive of the monkey's decisions. Specifically, we asked if  
647 the trial to trial variation in the responses correlates with the trial to trial variation  
648 in the monkey's choice behavior. To test this for each neuron, we counted the spikes  
649 in a 200 ms long epoch ending 100 ms before saccade initiation on each trial and  
650 incorporated this count in a logistic regression model of choice (GLM; see Methods).  
651 To facilitate comparison across the two stimulus configurations, we standardized  
652 the responses across trials of each configuration. We included the strength and  
653 direction of the presented stimulus as confounders, thus asking whether the  
654 variation in neural response tells us more about the upcoming choice than can be  
655 ascertained from the stimulus itself. This was indeed the case for 61.2% of cells in  
656 the Target-in-RF configuration and for 35.4% of cells in the RDM-in-RF



657 configuration (30 of 49 and 17 of 48 cells respectively; Equation 5,  $H_0: \beta_2 = 0$ ;  
658  $p < 0.05$ ; Figure 4A). The leverage of the neural activity on choice was significantly  
659 stronger in the Target-in-RF configuration ( $p = 0.005$ , signed rank test).

660 In a complementary analysis, we assessed whether the neural responses on  
661 ambiguous trials (0% motion coherence) differed according to the eventual choice  
662 of the animal. We computed choice probability (Britten et al 1996), a nonparametric  
663 statistic that quantifies the overlap between the distributions of responses of the  
664 neuron accompanying the two choices (see Methods). A choice probability of 0.5  
665 indicates that the two distributions are completely overlapping and therefore  
666 uninformative about the ensuing choice. At the single neuron level, choice  
667 probability of 32.4% and 25.8% of the neurons was significantly different from 0.5  
668 in the Target-in-RF and RDM-in-RF configurations, respectively (12 of 37 and 8 of  
669 31 cells with at least 10 trials at 0% coherence respectively,  $p < 0.05$ , permutation  
670 test). In both stimulus configurations, the mean choice probability of the neuronal  
671 population was significantly greater than 0.5 (Figure 4B, population mean  $\pm$  SEM of  
672  $0.66 \pm 0.03$  and  $0.59 \pm 0.04$  for Target-in-RF and RDM-in-RF respectively,  $p < 10^{-5}$  and  
673  $p < 0.02$  on t-test). For comparison between the two configurations, we calculated  
674 'grand' choice probability from standardized responses of all neurons on the 0%  
675 coherence trials (see Methods, Britten et al 1996). This choice probability was  
676 significantly stronger in the Target-in-RF configuration (0.65 vs. 0.56,  $p < 10^{-3}$ ,  
677 permutation test). From the analyses of choice probability and firing rate leverage  
678 on choice (Figure 4A-B) we adduce that LIP neurons responsive to both the RDM  
679 and the choice targets are informative about the choice, but it is the latter set of  
680 neurons (Target-in-RF) that covary more strongly with choice.

681 Finally, since the neurons exhibit time dependent changes in their activity in  
682 both stimulus configurations, we asked whether the variation of the buildup rates  
683 were predictive of the variation in the RTs on a trial-by-trial basis. We used the  
684 trials in which the monkey chose the target in the RF or the target consistent with  
685 the direction of motion preferred by the neuron (RDM-in-RF). For a majority of  
686 neurons recorded in the Target-in-RF configuration (36 of 49), the reaction times  
687 were inversely correlated with the slope of the neural responses (population mean:  
688  $-0.08$ ,  $p < 0.01$ ). In the RDM-in-RF configuration, the correlation was not significantly  
689 different from 0 (mean:  $0.03$ ,  $p > 0.33$ ) (Figure 4C) and significantly weaker than the  
690 correlations seen in the Target-in-RF configuration ( $p < 0.01$ , Kolmogorov-Smirnov  
691 test). This comparison suggests that only the pool of neurons that contain the  
692 chosen target in their RF carries information about the time the animal will take to  
693 report its decision.

694

### 695 **Signatures of noisy evidence accumulation in the response variance**

696 We also wished to ascertain whether the responses on single trials conform  
697 to the expectations of noisy evidence accumulation. If so, the variance of the firing  
698 rates across trials should increase linearly as a function of time (i.e., the number of  
699 samples accumulated). Also, the autocorrelation between firing rates at different  
700 times within a trial should conform to the pattern associated with the cumulative  
701 sum of random numbers. Such correlation should decay as a function of separation  
702 in time from the first sample and increase for equidistant samples as a function of

703 time from the onset of accumulation (see Methods). We used the method developed  
704 by de Lafuente et al (2015) (based on Churchland et al (2011)) to estimate these  
705 quantities.

706 The variance and autocorrelation patterns varied markedly based on  
707 whether the neurons contained the target or the RDM in their RF. In the Target-in-  
708 RF configuration, the variance increased linearly with time during the same epoch  
709 that the mean firing rates seemed to reflect the integration of evidence (Figure 5A,  
710 shaded region). In the RDM-in-RF configuration, the rise in variance was  
711 significantly weaker ( $p < 10^{-10}$ , bootstrap analysis). Also, the observed  
712 autocorrelation matrix for the responses in the Target-in-RF configuration (Figure  
713 6B,D,F) resembled the theoretical prediction ( $R^2 = 0.88$ ). In contrast, the pattern of  
714 autocorrelations (Figure 6C,E,G) for the responses in the RDM-in-RF configuration  
715 diverged markedly from the predicted pattern ( $R^2 = 0.2$ ). A bootstrap analysis  
716 confirmed that the difference in  $R^2$  values between the two configurations was  
717 statistically reliable ( $p < 10^{-10}$ ; see Methods). Later, we show that the deviation of the  
718 autocorrelation pattern from theoretical prediction cannot be attributed to a muted  
719 drift diffusion process unfolding on the background of a strong non-directional  
720 sensory response (Figure 9).

721 The variance of the neural response also affords a more refined examination  
722 of the mechanism of decision termination. The firing rate averages in Figure 3B  
723 suggest the possibility that decisions terminate when the firing rate of the neurons  
724 with the chosen target in their RF reach a threshold. A more stringent test of a  
725 threshold is that even for the same motion strength, the variance of the neural  
726 response should approach a minimum just before the saccade. Indeed, we observed  
727 a precipitous decline in the variance in the  $\sim 100$  ms preceding the saccade for the  
728 neuronal pool with the chosen target in the RF (Figure 5B, solid blue line). The  
729 variance in the time bin preceding the saccade was significantly lower than the  
730 variance in its prior time bin ( $p < 0.01$ , t-test). This decline in variance was more  
731 precipitous than that seen for the other three conditions shown in Figure 5B  
732 (ANOVA,  $p < 0.03$ , see Methods).

733 Together, the analyses of time dependent variance and autocorrelation  
734 reveal that neurons in the Target-in-RF configuration exhibit firing rate patterns  
735 consistent with a process that represents the running sum of noisy samples of  
736 evidence to a criterion level. The analyses complement the observations made  
737 earlier on the mean firing rates by demonstrating conformance with the second  
738 order statistics of diffusion to a bound. These features were less apparent when the  
739 same neurons were studied in the RDM-in-RF configuration. This neural population  
740 does not appear to represent the accumulation of the noisy evidence that supports  
741 the monkey's decisions. They reflect the direction of motion during the time course  
742 of decision formation but not the state of the accumulated evidence that can be used  
743 to terminate the decision process. We next consider a possible account of their  
744 pattern of activity.

## 745 746 **A model of interaction between populations**

747 How could the responses of neurons with the RDM in their RF correlate with  
748 the decision outcome without representing the process of evidence accumulation?

749 One possibility is that the weaker decision-related signals observed in the  
750 population with the RDM in their RF are inherited from the populations that have  
751 the choice targets in their RF and are involved in the accumulation process. It has  
752 been shown that responses of LIP neurons to visual stimuli are suppressed by  
753 concurrently presented visual stimuli when they are well outside the RF (Balan et al  
754 2008, Churchland et al 2008), even by as much as 50° visual angle (Falkner et al  
755 2010, Louie et al 2011). An asymmetrical influence of the two Target-in-RF  
756 populations could lead to the appearance of direction selectivity and a correlation  
757 with the animal's choices in the RDM-in-RF population. Moreover, the noise added  
758 through this additional step could explain the divergence of the variance and  
759 autocorrelation of the RDM-in-RF population from the theoretical predictions of a  
760 diffusion process. Additionally, such an extra step could account for the timing of  
761 direction selectivity in the RDM-in-RF population, which lags slightly behind that of  
762 the Target-in-RF population.

763 To evaluate the plausibility of this idea, we simulated the responses of three  
764 neural populations—one representing the motion stimulus and two representing  
765 the choice targets—during the motion viewing epoch (Figure 7A). In the model, the  
766 RDM-in-RF population receives direct excitation from the visual representation of  
767 the dynamic random dots. This direct excitation furnishes a constant firing rate that  
768 varies from trial to trial, but importantly, is not direction selective (Figure 7C). The  
769 two Target-in-RF populations start off at a steady firing rate, simulating the steady  
770 state sensory response to the target already present in the RF. The responses then  
771 follow drift-diffusion dynamics starting at 180 ms, simulating evidence  
772 accumulation. The drift rate was set to be directly or inversely proportional to  
773 motion coherence for the populations representing the correct and incorrect  
774 targets, respectively (Figure 7B).

775 The three populations interact through divisive suppression (Carandini &  
776 Heeger 2011, Louie et al 2011, Sceniak et al 2001) at each time point, parameterized  
777 by the  $\omega$  terms in Equation 9 (Methods). We set these parameters to approximate  
778 the observed neural responses to the 25.6% motion strength RDM (illustrated in  
779 Figure 7F-G). We assumed that the early dip in the response of the Target-in-RF  
780 neurons (arrow, Figure 7F) was caused by suppression from the neurons activated  
781 by the appearance of the RDM ( $\omega_{DT1}=\omega_{DT2}$ ). The suppression between the two  
782 Target-in-RF pools ( $\omega_{T1T2}=\omega_{T2T1}$ ) was estimated from the onset and steady state  
783 responses after the appearance of the target in the RF. Suppression of the RDM-in-  
784 RF pool from the Target-in-RF pools ( $\omega_{T1D}$  and  $\omega_{T2D}$ ) were adjusted around  $\omega_{DT}$  to  
785 approximate the separation in firing rate traces shown in Figure 7G (see Methods).  
786 Such asymmetric influence of the two Target-in-RF populations might arise from  
787 differences in their spatial relationship (neuronal connectivity) with the RDM-in-RF  
788 population. These adjustments were sufficient to mimic the observed mean  
789 responses of the neural population in our simulations (Figure 7D-E). In addition, we  
790 assumed that the suppressive interaction signals were corrupted by a small amount  
791 of noise (see Methods). Importantly, according to the model, the direction selectivity  
792 of the RDM-in-RF population is derived solely from the suppressive inputs from the  
793 Target-in-RF populations.

794 This simple model reproduced the main features of our results (Figure 8).

795 After the implementation of suppression, the Target-in-RF population retained the  
796 time course of the variance and the pattern of autocorrelation expected of a  
797 diffusion process. Notably, the variance and autocorrelation in the RDM-in-RF  
798 population also conformed to the patterns in the neural data: (*i*) the attenuated  
799 increase in variance as a function of time and (*ii*) the divergence in the pattern of  
800 autocorrelation from the theoretical prediction of diffusion. We also considered an  
801 alternative model in which the RDM-in-RF population itself represents an  
802 attenuated evidence accumulation signal in parallel with the Target-in-RF  
803 populations (Figure 9). To do this, we removed the lateral interactions and  
804 implemented the accumulation identically to the Target-in-RF population, but  
805 matching the observed firing rate dynamics and variance in the RDM-in-RF data  
806 (displayed in Figures 7G and 5A, respectively). This model was significantly worse  
807 in accounting for the pattern of autocorrelation observed in the data ( $\Delta\text{BIC} > 5 \times 10^3$ ).  
808 We thus favor the model with divisive suppression, which accounts for the presence  
809 of choice related activity in the RDM-in-RF population and the absence of clear signs  
810 of noisy evidence accumulation.

811  
812

## 813 **DISCUSSION**

814

815 We compared decision related activity in the sensory and motor-planning  
816 responses of LIP neurons. We conclude that the process of evidence accumulation  
817 leading to choice is revealed primarily in motor preparatory responses. The sensory  
818 responses exhibit a weak relationship with the animal's behavior, but our results  
819 and simulations suggest that this relationship is likely inherited from the motor  
820 preparatory responses. We first discuss our results in the context of previous  
821 studies of area LIP and then consider their implication on the broader question of  
822 routing of information in the cortex.

823

### 824 **Properties of neural responses in area LIP**

825

826 There has been a long debate about the relative importance of sensory  
827 salience-related signals and saccade preparatory signals in area LIP (Andersen &  
828 Buneo 2002, Barash et al 1991a, Bushnell et al 1981, Colby & Goldberg 1999). Many  
829 neurons show inherent selectivity for visual features such as direction and shape,  
830 even in monkeys that have never been trained to use such information (Fanini &  
831 Assad 2009, Sereno & Maunsell 1998). In addition, training induces stimulus  
832 selectivity that can be distinct from intrinsic selectivity (Sarma et al 2015, Toth &  
833 Assad 2002). LIP neurons also carry a rich representation of saccade plans. They  
834 display spatially selective persistent activity when the animal plans a saccade to a  
835 previously instructed, but no longer visible target (Barash et al 1991a, Gnadt &  
836 Andersen 1988). This persistent activity is dissociable from the sensory response  
837 evoked by the target (Mazzoni et al 1996) and can encode other factors that bear on  
838 the saccade plan, such as the probability that a saccade will be instructed (Janssen &  
839 Shadlen 2005) and the expected reward (Platt & Glimcher 1999, Sugrue et al 2004).  
The richness of saccadic planning is particularly evident in perceptual decision-

840 making tasks, where the neuronal activity continually tracks the current state of the  
841 evidence for choosing the target in the neuron's RF (Bollimunta et al 2012, Mazurek  
842 et al 2003).

843 By recording from the same LIP neurons when they belonged to the  
844 population representing either the RDM or a choice target, we could directly  
845 compare the sensory- and saccade-related responses. While both populations  
846 modulated their activity in accordance with the strength and direction of the RDM,  
847 there were important differences. This modulation was more intense when a choice  
848 target was in the RF. While the RDM elicited a strong response when it was in the  
849 RF, the dependence on direction and stimulus strength was weaker. This is unlikely  
850 to be explained by saturation of the response, because the same neurons attained  
851 higher firing rates before saccade onset when the target was in the RF (cf. Figure 3B  
852 and Figure 3C). Further, the variance and autocorrelation patterns of the neuronal  
853 responses were consistent with the predictions of noisy evidence accumulation only  
854 when the neurons contained a target in their RF. Finally, a neural correlate of  
855 decision termination was only apparent when a target was in the RF.

856 Although we have used the term "sensory" to describe the direction selective  
857 responses of neurons with the RDM in their RF, the gradual build-up of the firing  
858 rates of these neurons (Figure 3C) differed from the constant firing rates reported in  
859 naïve monkeys (Fanini & Assad 2009). We suspect that the responses are not  
860 sensory in the way one would characterize the responses of neurons in visual areas  
861 MT/MST or even the visual responses of LIP neurons to transient stimuli (e.g.,  
862 targets) as they were remarkably slow, emerging 190 ms after stimulus onset (at the  
863 highest coherence). This is far later than the ~50 ms latency of direction selectivity  
864 (Fanini & Assad 2009) and the ~100ms latency for direction-category selectivity  
865 (Swaminathan & Freedman 2012), and it is longer than the 180 ms latency of  
866 decision-related signals observed in the neuronal pool representing the targets.

867 Together, these considerations suggest that the neuronal pool representing  
868 the RDM inherits its direction and choice related signals from the neuronal pools  
869 representing the targets. We demonstrated that a model of lateral interactions  
870 serving the general purpose of gain control (Carandini & Heeger 2011) is sufficient  
871 to produce these effects. Such lateral interactions are well established in upstream  
872 visual areas (Hunter & Born 2011, Schein & Desimone 1990, Shushruth et al 2009).  
873 In LIP, lateral interactions are thought to mediate the suppressive effect of visual  
874 stimuli presented outside a neuron's RF (Balan et al 2008, Churchland et al 2008,  
875 Zhang et al 2017), even from distances >50° away from the RF (Falkner et al 2010,  
876 Louie et al 2011). A limitation of the present study is that we do not have access to  
877 two classes of neurons on the same trials. Recording simultaneously from neurons  
878 that represent the RDM and at least one choice target, would allow for a direct test  
879 of the lateral interactions that we modeled. For example, we would predict that the  
880 weaker leverage of the RDM-in-RF neurons would be explained away (i.e.,  
881 mediated) by inclusion of Target-in-RF responses in the same GLM.

882

### 883 **Routing of information in cortex**

884 We do not know how the momentary evidence represented by populations of  
885 direction selective neurons in the visual cortex makes its way specifically to the

886 target-representing neurons in LIP. There are projections from areas MT and MST to  
887 area LIP, but it is difficult to reconcile this direct pathway with the long latency of  
888 the decision related activity in LIP. The delay of the decision related responses  
889 relative to the latency of the visual responses in LIP (~50 ms), suggests a role for  
890 some form of memory buffer and/or a multisynaptic chain through which decision  
891 relevant information must pass before reaching the saccade planning neurons in  
892 LIP. This is one reason to suspect that apparently simple perceptual decisions may  
893 share similarities with more complex decisions that derive evidence from memory  
894 and other evaluations (Shadlen & Shohamy 2016).

895 We must emphasize that area LIP is not the only region that receives  
896 decision-pertinent signals in this task. Other areas involved in the planning of eye  
897 movements, such as FEF/Area 46, caudate nucleus and superior colliculus, also have  
898 access to such input (Ding & Gold 2010, Ding & Gold 2012, Horwitz & Newsome  
899 1999, Kim & Shadlen 1999, Mante et al 2013). However, the decision related activity  
900 in these areas arises with comparable latencies, so they do not furnish an  
901 explanation for the long latency in LIP. We favor the idea that the latency is  
902 necessitated by limitations in connectivity between the many possible sources of  
903 evidence bearing on the salience of an item and the neurons that represent such  
904 items as potential affordances to the motor system. This connectivity constraint  
905 might necessitate active routing (Kastner & Pinsk 2004, Olshausen et al 1993),  
906 although this process is poorly understood.

907 Our results also invite caution when interpreting trial-to-trial correlations  
908 between neural response and choice behavior. The neuronal pool in LIP  
909 representing the RDM has a mean CP of 0.59, larger than the reported CP of 0.54 for  
910 neurons in area MT (Cohen & Newsome 2009) that are known to play a causal role  
911 in affecting choice and RT in this task (Ditterich et al 2003, Salzman et al 1990). One  
912 might therefore be tempted to conclude that the RDM-in-RF population plays a role  
913 in evidence accumulation leading to the decision, but this is at odds with our  
914 findings. In the RDM task, the sequential sampling framework (e.g., drift-diffusion)  
915 provides a detailed mechanistic account of evidence accumulation both at the level  
916 of behavior and at the level of its instantiation in the neural responses. This enabled  
917 us to show that only the neuronal population involved in planning of the motor  
918 action reflected the computations relevant to decision-making.

919 If the neurons with the RDM in the RF do not represent the evolving  
920 evidence, a natural question is what do these neurons signify? One obvious  
921 possibility is that they simply represent an object that might attract the gaze, as  
922 transient lights are wont to do. Another possibility is that they represent the focus of  
923 spatial attention (Colby & Goldberg 1999). However, this focus should be initially on  
924 the RDM and then either remain stationary through the decision or gradually give  
925 way to the chosen target. This is inconsistent with the dynamics observed in our  
926 data, which look like a muted version of the decision related signals exhibited by  
927 neurons with a choice target in the RF. The same objection applies to the proposal  
928 that these neurons represent the salience of the RDM (Bisley & Goldberg 2010). A  
929 more speculative idea is that the neurons that contain the RDM in their RF confer  
930 information bearing on the spatial origins of the evidence—that is, they help to bind

931 the location of the thing we are deciding about to the decision itself, which is about  
932 what to do.

## 933 REFERENCES

934

935 Andersen RA, Buneo CA. 2002. Intentional maps in posterior parietal cortex. *Annu*  
936 *Rev Neurosci* 25: 189-220

937 Balan PF, Oristaglio J, Schneider DM, Gottlieb J. 2008. Neuronal correlates of the set-  
938 size effect in monkey lateral intraparietal area. *PLoS Biol* 6: e158

939 Barash S, Bracewell RM, Fogassi L, Gnadt JW, Andersen RA. 1991a. Saccade-related  
940 activity in the lateral intraparietal area. I. Temporal properties; comparison  
941 with area 7a. *J Neurophysiol* 66: 1095-108

942 Barash S, Bracewell RM, Fogassi L, Gnadt JW, Andersen RA. 1991b. Saccade-related  
943 activity in the lateral intraparietal area. II. Spatial properties. *J Neurophysiol*  
944 66: 1109-24

945 Bennur S, Gold JI. 2011. Distinct representations of a perceptual decision and the  
946 associated oculomotor plan in the monkey lateral intraparietal area. *J*  
947 *Neurosci* 31: 913-21

948 Bisley JW, Goldberg ME. 2010. Attention, intention, and priority in the parietal lobe.  
949 *Annu Rev Neurosci* 33: 1-21

950 Bollimunta A, Ditterich J. 2011. Local Computation of Decision-Relevant Net Sensory  
951 Evidence in Parietal Cortex. *Cereb Cortex*

952 Bollimunta A, Totten D, Ditterich J. 2012. Neural dynamics of choice: single-trial  
953 analysis of decision-related activity in parietal cortex. *J Neurosci* 32: 12684-  
954 701

955 Britten KH, Newsome WT, Shadlen MN, Celebrini S, Movshon JA. 1996. A  
956 relationship between behavioral choice and the visual responses of neurons  
957 in macaque MT. *Vis Neurosci* 13: 87-100

958 Bushnell MC, Goldberg ME, Robinson DL. 1981. Behavioral enhancement of visual  
959 responses in monkey cerebral cortex. I. Modulation in posterior parietal  
960 cortex related to selective visual attention. *J Neurophysiol* 46: 755-72

961 Carandini M, Heeger DJ. 2011. Normalization as a canonical neural computation. *Nat*  
962 *Rev Neurosci* 13: 51-62

963 Churchland AK, Kiani R, Chaudhuri R, Wang XJ, Pouget A, Shadlen MN. 2011.  
964 Variance as a signature of neural computations during decision making.  
965 *Neuron* 69: 818-31

966 Churchland AK, Kiani R, Shadlen MN. 2008. Decision-making with multiple  
967 alternatives. *Nat Neurosci* 11: 693-702

968 Cisek P. 2007. Cortical mechanisms of action selection: the affordance competition  
969 hypothesis. *Philos Trans R Soc Lond B Biol Sci* 362: 1585-99

970 Cisek P, Kalaska JF. 2005. Neural correlates of reaching decisions in dorsal premotor  
971 cortex: specification of multiple direction choices and final selection of  
972 action. *Neuron* 45: 801-14

973 Cisek P, Kalaska JF. 2010. Neural mechanisms for interacting with a world full of  
974 action choices. *Annu Rev Neurosci* 33: 269-98

975 Cohen MR, Newsome WT. 2009. Estimates of the contribution of single neurons to  
976 perception depend on timescale and noise correlation. *J Neurosci* 29: 6635-  
977 48



- 978 Colby CL, Goldberg ME. 1999. Space and attention in parietal cortex. *Annu Rev*  
979 *Neurosci* 22: 319-49
- 980 de Lafuente V, Jazayeri M, Shadlen MN. 2015. Representation of accumulating  
981 evidence for a decision in two parietal areas. *J Neurosci* 35: 4306-18
- 982 Ding L, Gold JI. 2010. Caudate encodes multiple computations for perceptual  
983 decisions. *J Neurosci* 30: 15747-59
- 984 Ding L, Gold JI. 2012. Neural correlates of perceptual decision making before, during,  
985 and after decision commitment in monkey frontal eye field. *Cereb Cortex* 22:  
986 1052-67
- 987 Ditterich J, Mazurek ME, Shadlen MN. 2003. Microstimulation of visual cortex affects  
988 the speed of perceptual decisions. *Nat Neurosci* 6: 891-8
- 989 Falkner AL, Krishna BS, Goldberg ME. 2010. Surround suppression sharpens the  
990 priority map in the lateral intraparietal area. *J Neurosci* 30: 12787-97
- 991 Fanini A, Assad JA. 2009. Direction selectivity of neurons in the macaque lateral  
992 intraparietal area. *J Neurophysiol* 101: 289-305
- 993 Freedman DJ, Assad JA. 2006. Experience-dependent representation of visual  
994 categories in parietal cortex. *Nature* 443: 85-8
- 995 Freedman DJ, Assad JA. 2011. A proposed common neural mechanism for  
996 categorization and perceptual decisions. *Nat Neurosci* 14: 143-6
- 997 Gnadt JW, Andersen RA. 1988. Memory related motor planning activity in posterior  
998 parietal cortex of macaque. *Experimental brain research* 70: 216-20
- 999 Gold JI, Shadlen MN. 2000. Representation of a perceptual decision in developing  
1000 oculomotor commands. *Nature* 404: 390-4
- 1001 Gold JI, Shadlen MN. 2002. Banburismus and the brain: decoding the relationship  
1002 between sensory stimuli, decisions, and reward. *Neuron* 36: 299-308
- 1003 Gold JI, Shadlen MN. 2003. The influence of behavioral context on the representation  
1004 of a perceptual decision in developing oculomotor commands. *J Neurosci* 23:  
1005 632-51
- 1006 Goodwin SJ, Blackman RK, Sakellaridi S, Chafee MV. 2012. Executive control over  
1007 cognition: stronger and earlier rule-based modulation of spatial category  
1008 signals in prefrontal cortex relative to parietal cortex. *J Neurosci* 32: 3499-  
1009 515
- 1010 Hanes DP, Schall JD. 1996. Neural control of voluntary movement initiation. *Science*  
1011 274: 427-30
- 1012 Hanks T, Kiani R, Shadlen MN. 2014. A neural mechanism of speed-accuracy tradeoff  
1013 in macaque area LIP. *Elife* 3
- 1014 Horwitz GD, Newsome WT. 1999. Separate signals for target selection and  
1015 movement specification in the superior colliculus. *Science* 284: 1158-61
- 1016 Hunter JN, Born RT. 2011. Stimulus-dependent modulation of suppressive  
1017 influences in MT. *J Neurosci* 31: 678-86
- 1018 Janssen P, Shadlen MN. 2005. A representation of the hazard rate of elapsed time in  
1019 macaque area LIP. *Nat Neurosci* 8: 234-41
- 1020 Kang HR, Petzschner FH, Wolpert DM, Shadlen MN. 2017. Piercing of consciousness  
1021 as a threshold crossing operation. *Current biology* 27: 2285-95
- 1022 Kastner S, Pinsk MA. 2004. Visual attention as a multilevel selection process. *Cogn*  
1023 *Affect Behav Neurosci* 4: 483-500

- 1024 Kim JN, Shadlen MN. 1999. Neural correlates of a decision in the dorsolateral  
1025 prefrontal cortex of the macaque. *Nat Neurosci* 2: 176-85
- 1026 Klaes C, Westendorff S, Chakrabarti S, Gail A. 2011. Choosing goals, not rules:  
1027 deciding among rule-based action plans. *Neuron* 70: 536-48
- 1028 Kubanek J, Snyder LH. 2015. Reward-based decision signals in parietal cortex are  
1029 partially embodied. *J Neurosci* 35: 4869-81
- 1030 Lewis JW, Van Essen DC. 2000. Mapping of architectonic subdivisions in the  
1031 macaque monkey, with emphasis on parieto-occipital cortex. *The Journal of*  
1032 *comparative neurology* 428: 79-111
- 1033 Louie K, Grattan LE, Glimcher PW. 2011. Reward value-based gain control: divisive  
1034 normalization in parietal cortex. *J Neurosci* 31: 10627-39
- 1035 Mante V, Sussillo D, Shenoy KV, Newsome WT. 2013. Context-dependent  
1036 computation by recurrent dynamics in prefrontal cortex. *Nature* 503: 78-84
- 1037 Mazurek ME, Roitman JD, Ditterich J, Shadlen MN. 2003. A role for neural integrators  
1038 in perceptual decision making. *Cereb Cortex* 13: 1257-69
- 1039 Mazzone P, Bracewell RM, Barash S, Andersen RA. 1996. Motor intention activity in  
1040 the macaque's lateral intraparietal area. I. Dissociation of motor plan from  
1041 sensory memory. *J Neurophysiol* 76: 1439-56
- 1042 Newsome WT, Britten KH, Movshon JA. 1989. Neuronal correlates of a perceptual  
1043 decision. *Nature* 341: 52-4
- 1044 Olshausen BA, Anderson CH, Van Essen DC. 1993. A neurobiological model of visual  
1045 attention and invariant pattern recognition based on dynamic routing of  
1046 information. *J Neurosci* 13: 4700-19
- 1047 Palmer J, Huk AC, Shadlen MN. 2005. The effect of stimulus strength on the speed  
1048 and accuracy of a perceptual decision. *J Vis* 5: 376-404
- 1049 Platt ML, Glimcher PW. 1998. Response fields of intraparietal neurons quantified  
1050 with multiple saccadic targets. *Experimental brain research* 121: 65-75
- 1051 Platt ML, Glimcher PW. 1999. Neural correlates of decision variables in parietal  
1052 cortex. *Nature* 400: 233-8
- 1053 Ratcliff R, Rouder JN. 1998. Modeling response times for two-choice decisions.  
1054 *Psychological Science* 9: 347-56
- 1055 Roitman JD, Shadlen MN. 2002. Response of neurons in the lateral intraparietal area  
1056 during a combined visual discrimination reaction time task. *J Neurosci* 22:  
1057 9475-89
- 1058 Salzman CD, Britten KH, Newsome WT. 1990. Cortical microstimulation influences  
1059 perceptual judgements of motion direction. *Nature* 346: 174-7
- 1060 Sarma A, Masse NY, Wang XJ, Freedman DJ. 2015. Task-specific versus generalized  
1061 mnemonic representations in parietal and prefrontal cortices. *Nat Neurosci*
- 1062 Sceniak MP, Hawken MJ, Shapley R. 2001. Visual spatial characterization of macaque  
1063 V1 neurons. *J Neurophysiol* 85: 1873-87
- 1064 Schein SJ, Desimone R. 1990. Spectral properties of V4 neurons in the macaque. *J*  
1065 *Neurosci* 10: 3369-89
- 1066 Selen LP, Shadlen MN, Wolpert DM. 2012. Deliberation in the motor system: reflex  
1067 gains track evolving evidence leading to a decision. *J Neurosci* 32: 2276-86
- 1068 Sereno AB, Maunsell JH. 1998. Shape selectivity in primate lateral intraparietal  
1069 cortex. *Nature* 395: 500-3

- 1070 Shadlen MN, Hanks TD, Churchland AK, Kiani R, Yang T. 2006. The speed and  
1071 accuracy of a simple perceptual decision: a mathematical primer. *Bayesian*  
1072 *brain: Probabilistic approaches to neural coding*: 209-37
- 1073 Shadlen MN, Kiani R. 2013. Decision making as a window on cognition. *Neuron* 80:  
1074 791-806
- 1075 Shadlen MN, Kiani R, Hanks TD, Churchland AK. 2008. An intentional framework In  
1076 *Better than conscious?*, ed. C Engel, W Singer, pp. 71-101
- 1077 Shadlen MN, Newsome WT. 1996. Motion perception: seeing and deciding. *Proc Natl*  
1078 *Acad Sci U S A* 93: 628-33
- 1079 Shadlen MN, Shohamy D. 2016. Decision Making and Sequential Sampling from  
1080 Memory. *Neuron* 90: 927-39
- 1081 Shushruth S, Ichida JM, Levitt JB, Angelucci A. 2009. Comparison of spatial  
1082 summation properties of neurons in macaque V1 and V2. *J Neurophysiol* 102:  
1083 2069-83
- 1084 Smith PL, Ratcliff R. 2004. Psychology and neurobiology of simple decisions. *Trends*  
1085 *Neurosci* 27: 161-8
- 1086 Sugrue LP, Corrado GS, Newsome WT. 2004. Matching behavior and the  
1087 representation of value in the parietal cortex. *Science* 304: 1782-7
- 1088 Swaminathan SK, Freedman DJ. 2012. Preferential encoding of visual categories in  
1089 parietal cortex compared with prefrontal cortex. *Nat Neurosci* 15: 315-20
- 1090 Toth LJ, Assad JA. 2002. Dynamic coding of behaviourally relevant stimuli in parietal  
1091 cortex. *Nature* 415: 165-8
- 1092 Zhang W, Falkner AL, Krishna BS, Goldberg ME, Miller KD. 2017. Coupling between  
1093 One-Dimensional Networks Reconciles Conflicting Dynamics in LIP and  
1094 Reveals Its Recurrent Circuitry. *Neuron* 93: 221-34

## 1095 **FIGURE LEGENDS**

1096

1097 **FIGURE 1: Behavioral task configurations.** The monkey fixates at an instructed  
1098 location (x) and then two choice targets (red dots) appear in one of two  
1099 configurations:(1) *Target-in-RF*: One of the targets is situated in the RF of the  
1100 neuron being recorded from, and (2) *RDM-in-RF*: Both targets are situated outside  
1101 the RF. In the next step, the RDM is presented either inside (*RDM-in-RF*) or outside  
1102 the RF (*Target-in-RF*). The monkey is free to report its decision any time after the  
1103 appearance of the RDM by making a saccade to one of the targets.

1104

1105 **FIGURE 2: Predicting choices from diffusion-to-bound models fit to RTs. A-D:**  
1106 RTs of the two monkeys as a function of motion strength in the two task  
1107 configurations (see Methods for convention on sign of motion strength). Solid lines  
1108 show the fits of a diffusion-to-bound model. Data includes the trials at 0% motion  
1109 strength in which the monkey chose the target consistent with its bias (established  
1110 from logistic fits to the choice data) and correct trials at other motion strengths. **E-**  
1111 **H:** The probability the monkey chooses the target consistent with positive motion  
1112 direction, plotted as a function of motion strength. The dashed lines are predictions  
1113 from the corresponding fits of the RTs. Gray lines are fits to the choice data (logistic  
1114 regression).

1115 **FIGURE 2-EXTENDED DATA 1: Simultaneous fit of RT and choice with a**  
1116 **diffusion-to-bound model.** The probability of choosing the positive direction  
1117 target (**A,B**) and the mean RTs (**C,D**) are plotted as a function of motion strength and  
1118 direction (indicated by sign of coherence; see Methods) for the two monkeys in the  
1119 two stimulus configurations. The curves are fits to the data from a diffusion-to-  
1120 bound model with nonstationary bounds (see Methods). The fit parameters are  
1121 shown in Table 1. **E,F:** Mean decision times (solid curves) derived from the model  
1122 fits, plotted as a function of motion strength. Shading is  $\pm 1$  S.E.

1123

1124 **FIGURE 3: Neural population responses.** Average response of the recorded neural  
1125 population during *Target-in-RF* (**A,B**) and *RDM-in-RF* (**C,D**) configurations. Panels  
1126 **A,C** are aligned to the onset of RDM and include all trials sorted by direction and  
1127 strength of motion. Insets show average of detrended responses (i.e., after  
1128 subtraction of the mean response for all motion strengths, for each neuron). Panels  
1129 **B,D** are aligned to the saccade and includes correct trials (and 0% coherence trials  
1130 sorted by the animal's choices). **E:** Histograms of the distribution of Direction  
1131 Selectivity Index (DI) for the neural population recorded by Fanini and Assad  
1132 (2009) and for the neural population in the *RDM-in-RF* configuration of the present  
1133 study. **F:** Area under ROC for responses to the two directions of motion at 51.2%  
1134 coherence computed in 40 ms bins. The colored lines at the bottom indicate the time  
1135 bins in which this metric was significantly  $>0.5$  for the corresponding configuration.  
1136 **G:** The relation between the response buildup rate and motion strength. Filled  
1137 circles are data from trials with motion in the neuron's preferred direction and  
1138 unfilled circles for the opposite motion direction. Solid and dashed lines are  
1139 corresponding linear regression model fits.

1140 **FIGURE 3-EXTENDED DATA 1 and 2: Population responses of neurons in**  
1141 **individual animals.** Neural responses that were shown in Figure 3, panels A-D and  
1142 F plotted from data pooled separately for each individual monkey.

1143  
1144 **FIGURE 4: Leverage of neural activity on behavior.** Scatter plot and histograms  
1145 for the two stimulus configurations showing the distribution of  $\beta_2$  term (**A**) of  
1146 logistic regression (Equation 5), choice probability (**B**) and coefficient of correlation  
1147 (**C**) between slope of response buildup and RT. Neurons for which the metric was  
1148 significant are shown with a blue fill (significant in the Target-in-RF configuration)  
1149 and/or a green border (significant in the RDM-in-RF configuration) in the scatter  
1150 plots and as darker colors in the histograms. Data points in **B** outside the axes  
1151 indicate neurons where choice probability could be determined for only one of the  
1152 two configurations. One and three such data points are not shown in the scatter  
1153 plots of **A** and **C** respectively.

1154  
1155 **FIGURE 5: Variance of responses.** The variance of neural responses aligned to the  
1156 onset of RDM (**A**) or to the saccade (**B**). Total variance is computed in 60 ms bins  
1157 and the point process variance subtracted from it (see Methods). In **B**, solid lines are  
1158 data from trials in which the animal chose the preferred target of the neuron and  
1159 dashed lines are from trials with the opposite choice.

1160  
1161 **FIGURE 6: Autocorrelation of responses.** **A:** Theoretical prediction of the  
1162 autocorrelation matrix for six time bins ( $\rho_{i,j}$ ) of a diffusion process. Only the 15  
1163 unique values (upper triangular matrix,  $i < j$ ) are shown. **B,C:** Estimated  
1164 autocorrelation for the neural responses in the two stimulus configurations. **D,E:**  
1165 Deviation of **B,C** from the theoretical predictions shown in **A**. **F,G:** Comparison of  
1166 correlation values in **A-C** between theory (black lines) and data (colored lines). Solid  
1167 lines are correlation along the top row (between first and  $j^{\text{th}}$  time bins) and dashed  
1168 lines along the first juxtadiagonal (correlation between  $j^{\text{th}}$  and its preceding time  
1169 bins). Line style and color correspond to those in panels A-C.

1170  
1171 **FIGURE 7: Divisive suppression model.** **A:** Schematic of the three populations  
1172 simulated in the model – one population representing the RDM (D) and two  
1173 representing the targets ( $T_1$  and  $T_2$ ). The  $\omega$  terms denote the suppressive influence  
1174 of each population on the other two. **B:** Average response of simulated  $T_1$  (solid  
1175 cyan) and  $T_2$  (dashed cyan) populations across trials in which the direction of  
1176 motion supported  $T_1$ . Dark and light gray traces show responses to 10 example  
1177 trials for the two populations. **C:** The mean and example trial responses of the D  
1178 population to the two directions of motion. Dark and light gray indicate motion  
1179 towards  $T_1$  and  $T_2$ , respectively. Solid and dashed cyan lines denote the  
1180 corresponding average response traces, but they overlap, as the two populations do  
1181 not distinguish between directions of motion. Insets in B and C show the noisy  
1182 versions of the corresponding responses that furnish the divisive suppression. **D,E:**  
1183 The responses of the three populations after implementation of divisive  
1184 suppression. Color scheme is the same as in panels B and C. The simulated  
1185 responses in B-E are smoothed with a 10 ms boxcar filter. **F,G:** The average

1186 responses of the recorded neural population to the 25.6% motion strength stimulus  
1187 in the Target-in-RF and RDM-in-RF configurations that our simulations  
1188 approximated. These traces are the same as the cyan traces in Figure 3A & C.

1189

1190 **FIGURE 8: Variance and correlation of the simulated responses.** *A:* Variance as a  
1191 function of time in two of the simulated suppressed populations (D and T<sub>1</sub> for trials  
1192 with motion supporting T<sub>1</sub> choice). *B:* Autocorrelation in the simulated suppressed  
1193 Target-in-RF population T<sub>1</sub>. Conventions as in Figure 6B. *C:* Deviation of the  
1194 autocorrelation in the model from the autocorrelation estimated from the data in  
1195 the Target-in-RF configuration. *D,E:* Same as B and C for the RDM-in-RF population.  
1196 *F:* Comparison of correlation values along the top row (solid lines) and first  
1197 juxtadiagonal (dashed lines) between the model (see panels *B* & *D*) and the data.  
1198 Circles show the correlation estimated from data. Filled circles correspond to the  
1199 values along the top row and open circles to the values along the juxtadiagonal. Gray  
1200 lines show the correlation expected from a diffusion process.

1201

1202 **FIGURE 9: Alternative model with the RDM-in-RF population showing drift-**  
1203 **diffusion dynamics.** This model assumes that there is no interaction between the  
1204 RDM-in-RF neurons and the Target-in-RF neurons. *A-B:* Responses of model  
1205 neurons. Respectively similar to Figure 7B-C. *C-H:* Variance and autocorrelation in  
1206 the model and the data. Conventions as in Figure 8A-F respectively.

1207 **TABLES**

1208

1209 Table 1: Bounded diffusion model best fit parameter values ( $\pm$ SE)

| Parameter       | Monkey N<br>(Target-in-RF) | Monkey N<br>(RDM-in-RF) | Monkey B<br>(Target-in-RF) | Monkey B<br>(RDM-in-RF) |
|-----------------|----------------------------|-------------------------|----------------------------|-------------------------|
| $\kappa$        | $16.05 \pm 0.38$           | $13.86 \pm 0.44$        | $9.66 \pm 0.39$            | $12.00 \pm 0.70$        |
| $B_0$           | $0.72 \pm 0.02$            | $0.78 \pm 0.02$         | $0.52 \pm 0.02$            | $0.47 \pm 0.04$         |
| $B_{del}$       | $0.01 \pm 0.00$            | $0.00 \pm 0.01$         | $0.02 \pm 0.01$            | $0.02 \pm 0.01$         |
| $B_2$           | $0.67 \pm 0.09$            | $0.97 \pm 0.08$         | $1.16 \pm 0.21$            | $1.26 \pm 0.38$         |
| $t_{nd1}$       | $0.34 \pm 0.01$            | $0.29 \pm 0.01$         | $0.41 \pm 0.01$            | $0.45 \pm 0.01$         |
| $\sigma_{tnd1}$ | $0.13 \pm 0.00$            | $0.11 \pm 0.00$         | $0.07 \pm 0.00$            | $0.08 \pm 0.00$         |
| $t_{nd2}$       | $0.38 \pm 0.01$            | $0.32 \pm 0.01$         | $0.47 \pm 0.01$            | $0.43 \pm 0.01$         |
| $\sigma_{tnd2}$ | $0.12 \pm 0.00$            | $0.12 \pm 0.00$         | $0.07 \pm 0.00$            | $0.06 \pm 0.00$         |
| $C_0$           | $0.00 \pm 0.00$            | $0.00 \pm 0.00$         | $-0.02 \pm 0.00$           | $0.02 \pm 0.01$         |

1210

1211 Table 2: Parameter values for simulations

| Parameter                       | Divisive suppression model | Parallel diffusion model |
|---------------------------------|----------------------------|--------------------------|
| $K(T)$                          | 80.4                       | 52.8                     |
| $\alpha(T)$                     | 29.8                       | 23.7                     |
| $K(D)$                          | N/A                        | 25.0                     |
| $\alpha(D)$                     | N/A                        | 9.6                      |
| $\omega_{T2T1} = \omega_{T1T2}$ | $2 \times 10^{-3}$         | N/A                      |
| $\omega_{DT1} = \omega_{DT2}$   | $4 \times 10^{-3}$         | N/A                      |
| $\omega_{T1D}$                  | $6 \times 10^{-3}$         | N/A                      |
| $\omega_{T2D}$                  | $1 \times 10^{-3}$         | N/A                      |
| $\varphi_{RDM}$                 | 0.38                       | 0.39                     |
| $\varphi_{Tar}$                 | 0.43                       | 0.43                     |
| $V_{RDM}$                       | 4.17                       | 0                        |

1212

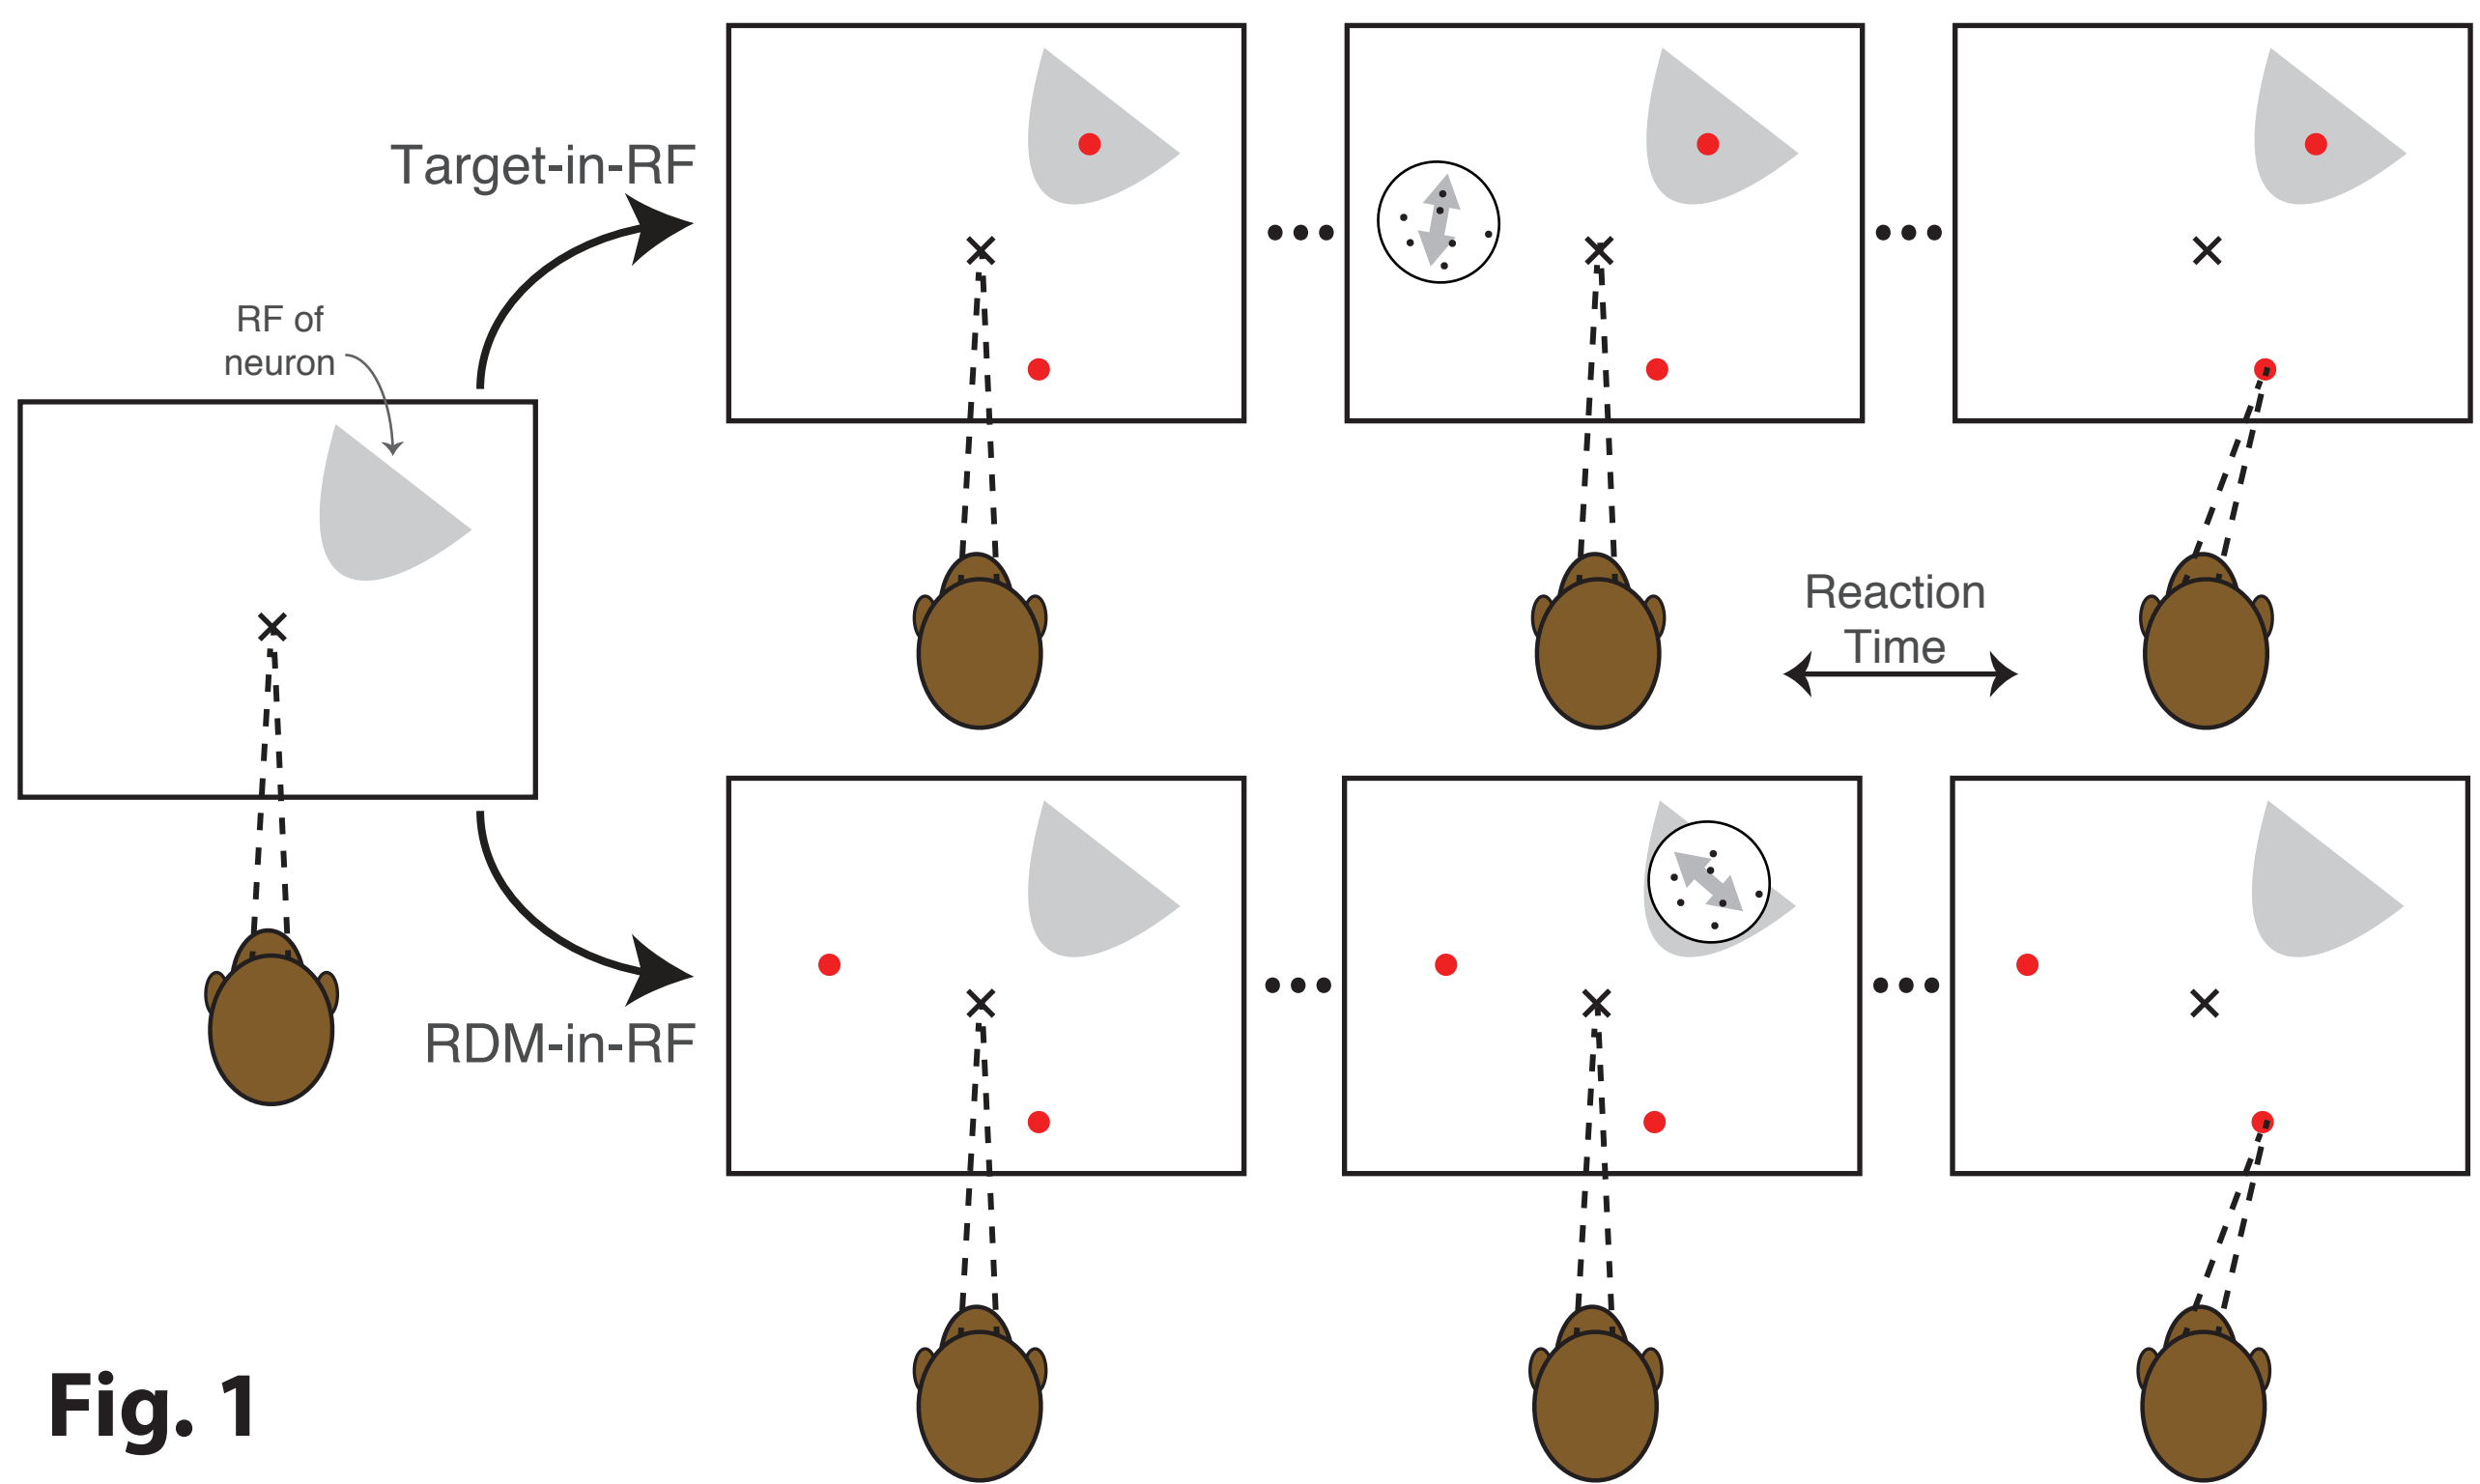

**Fig. 1**



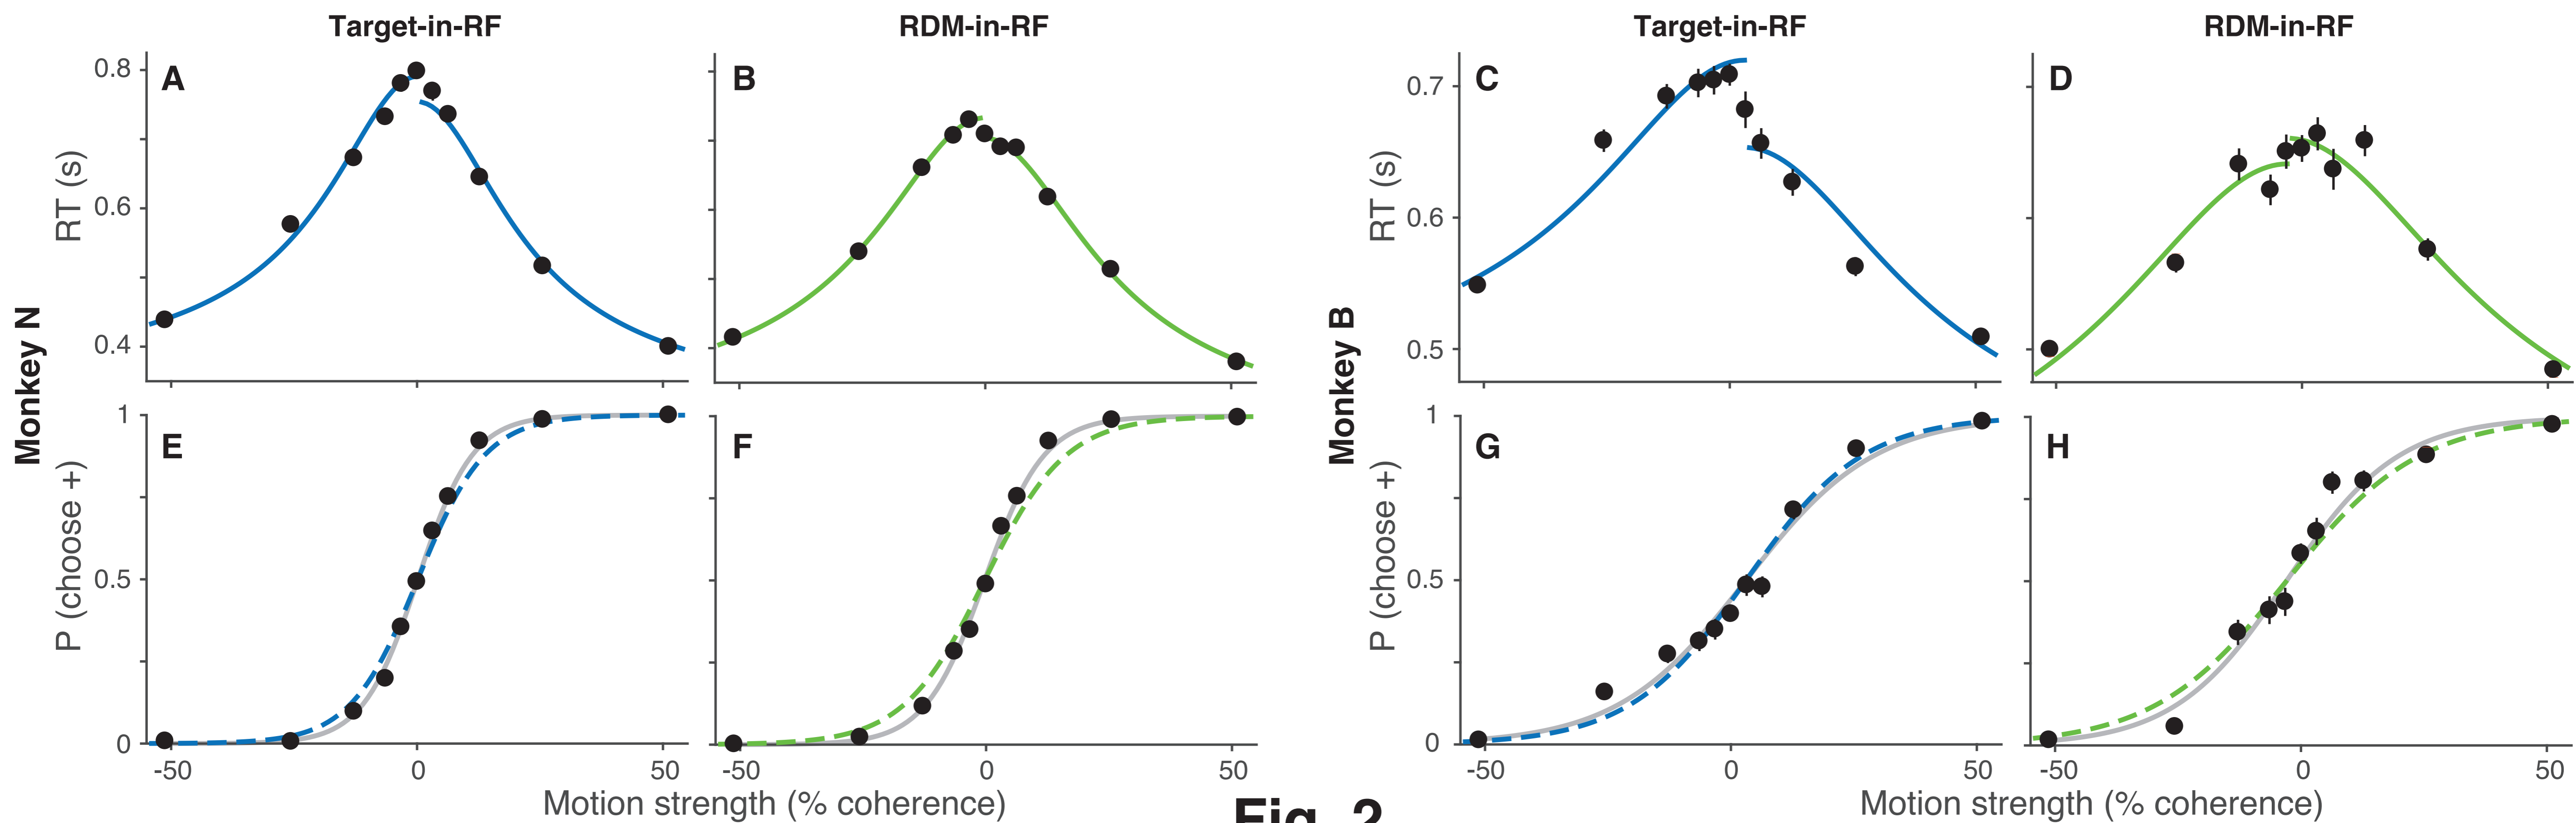

## Monkey N (28 Sessions)

## Monkey B (21 Sessions)

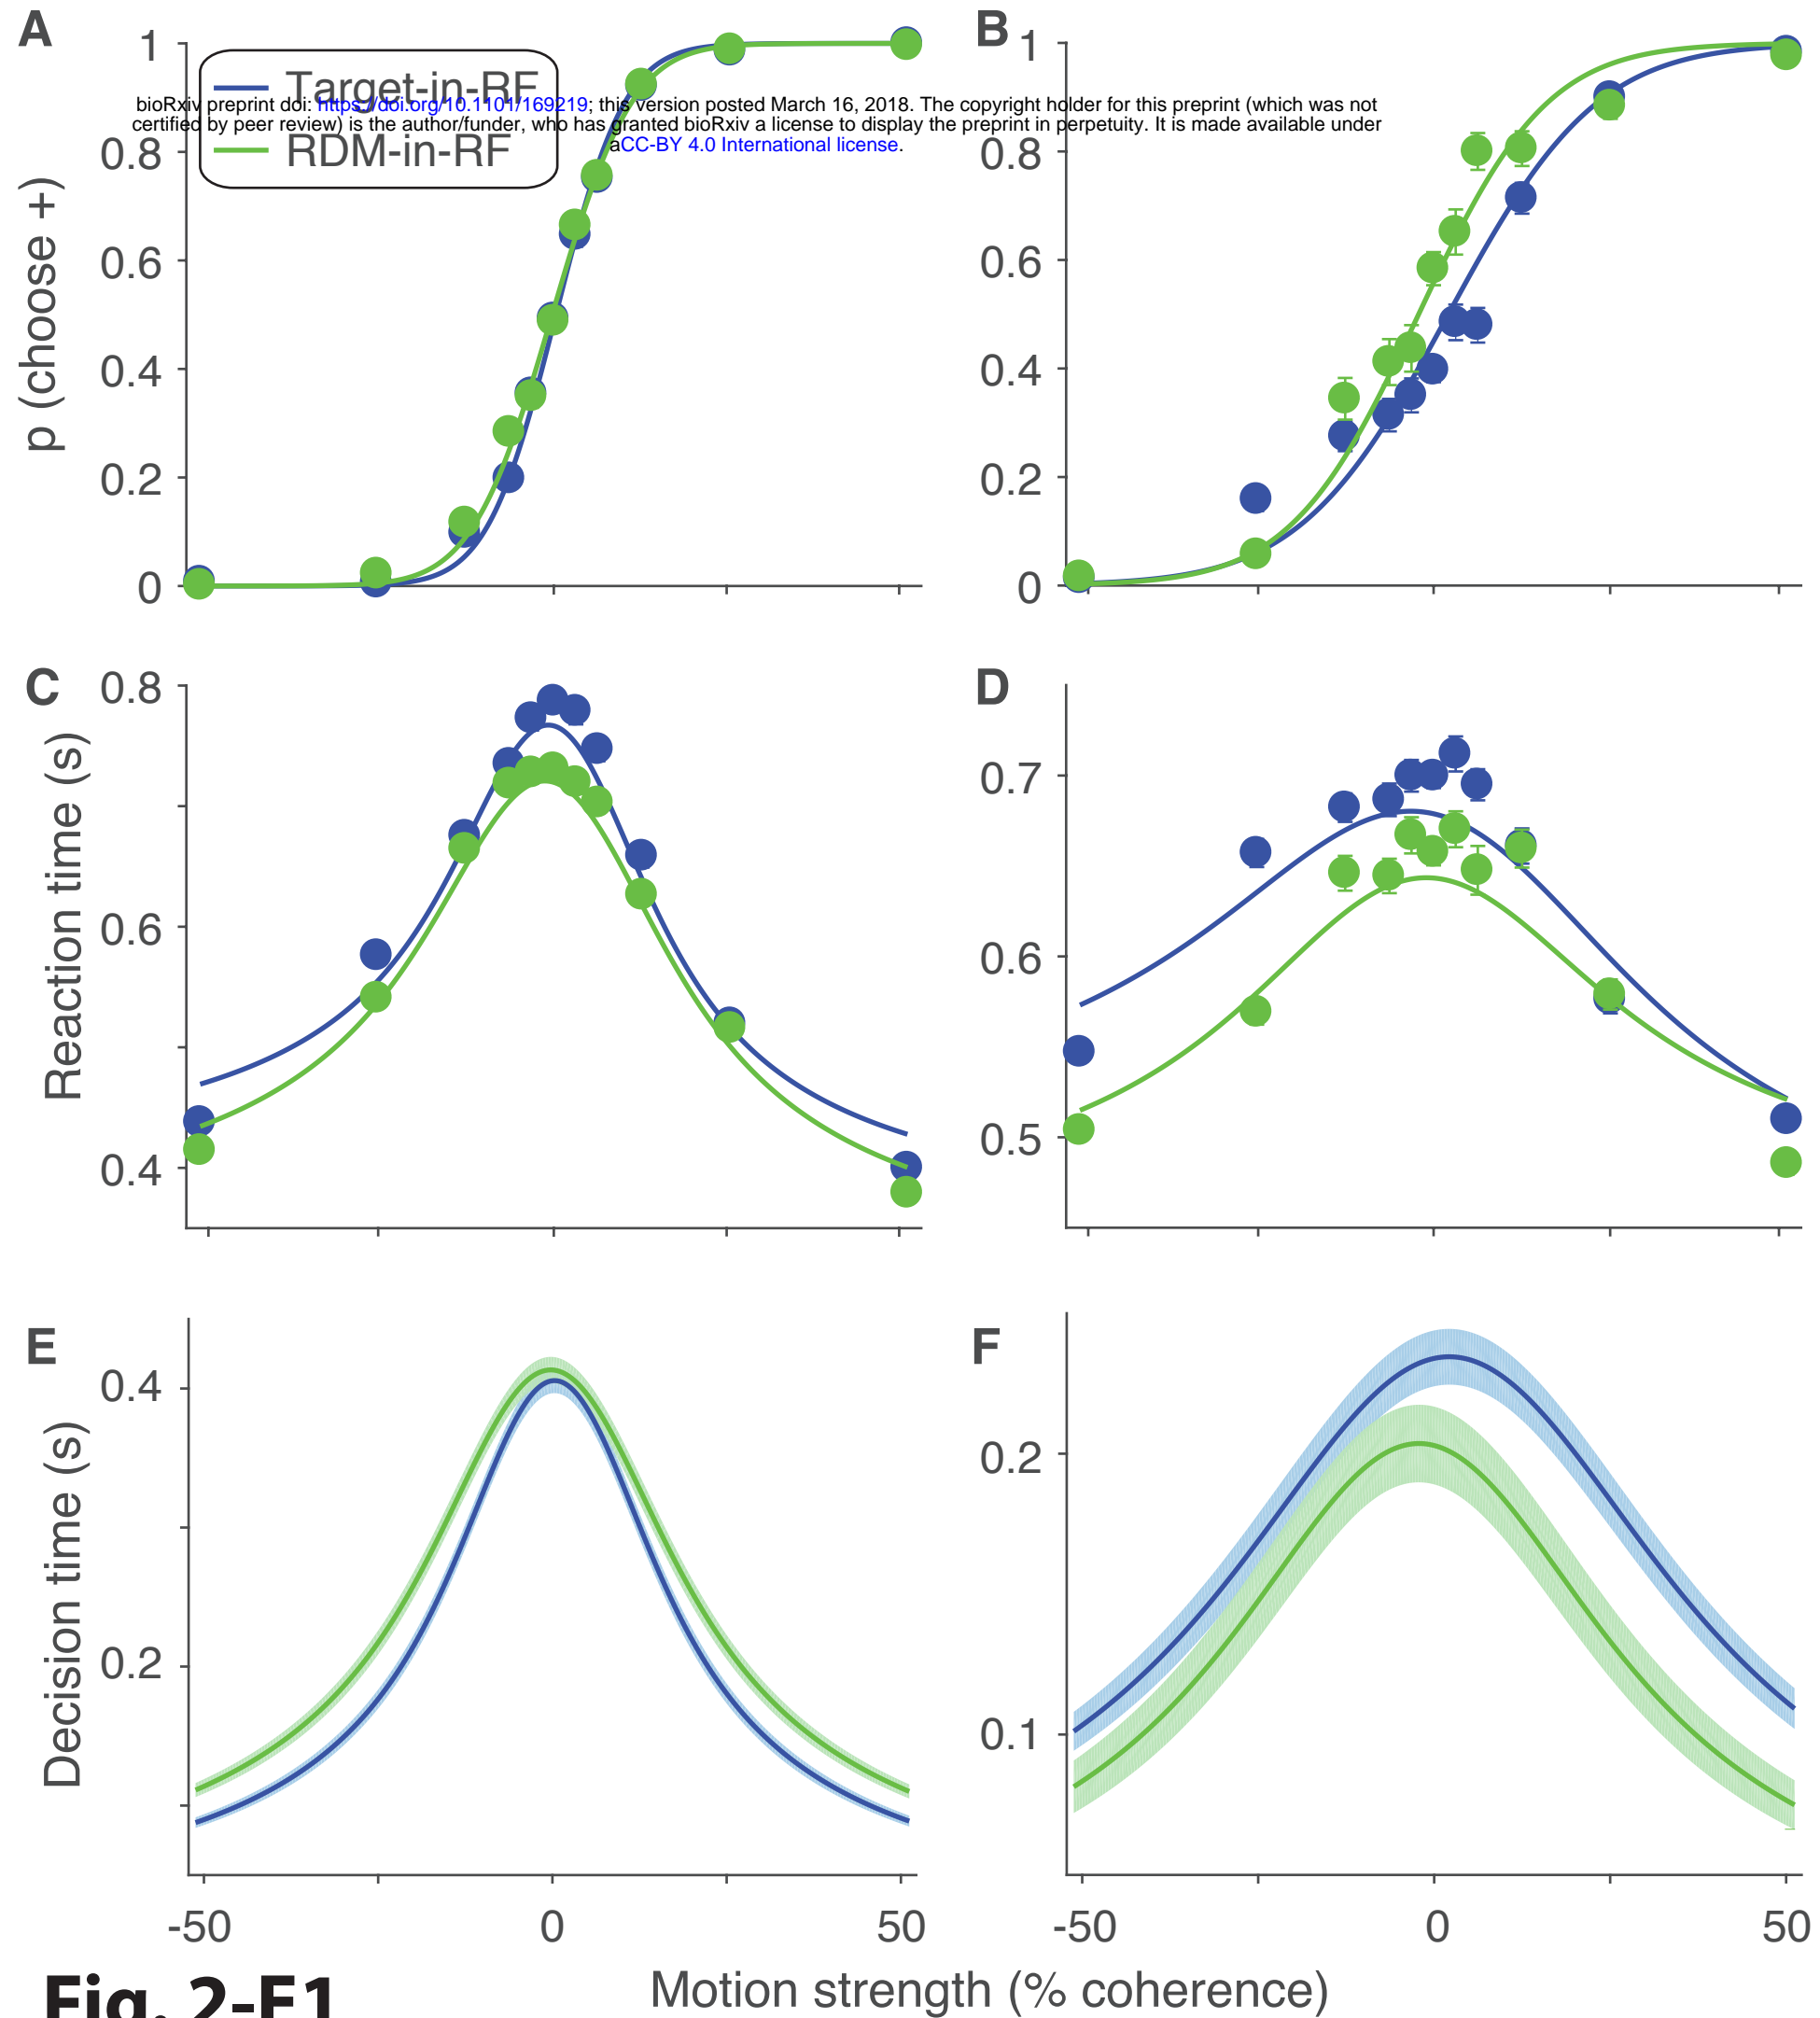

**Fig. 2-E1**

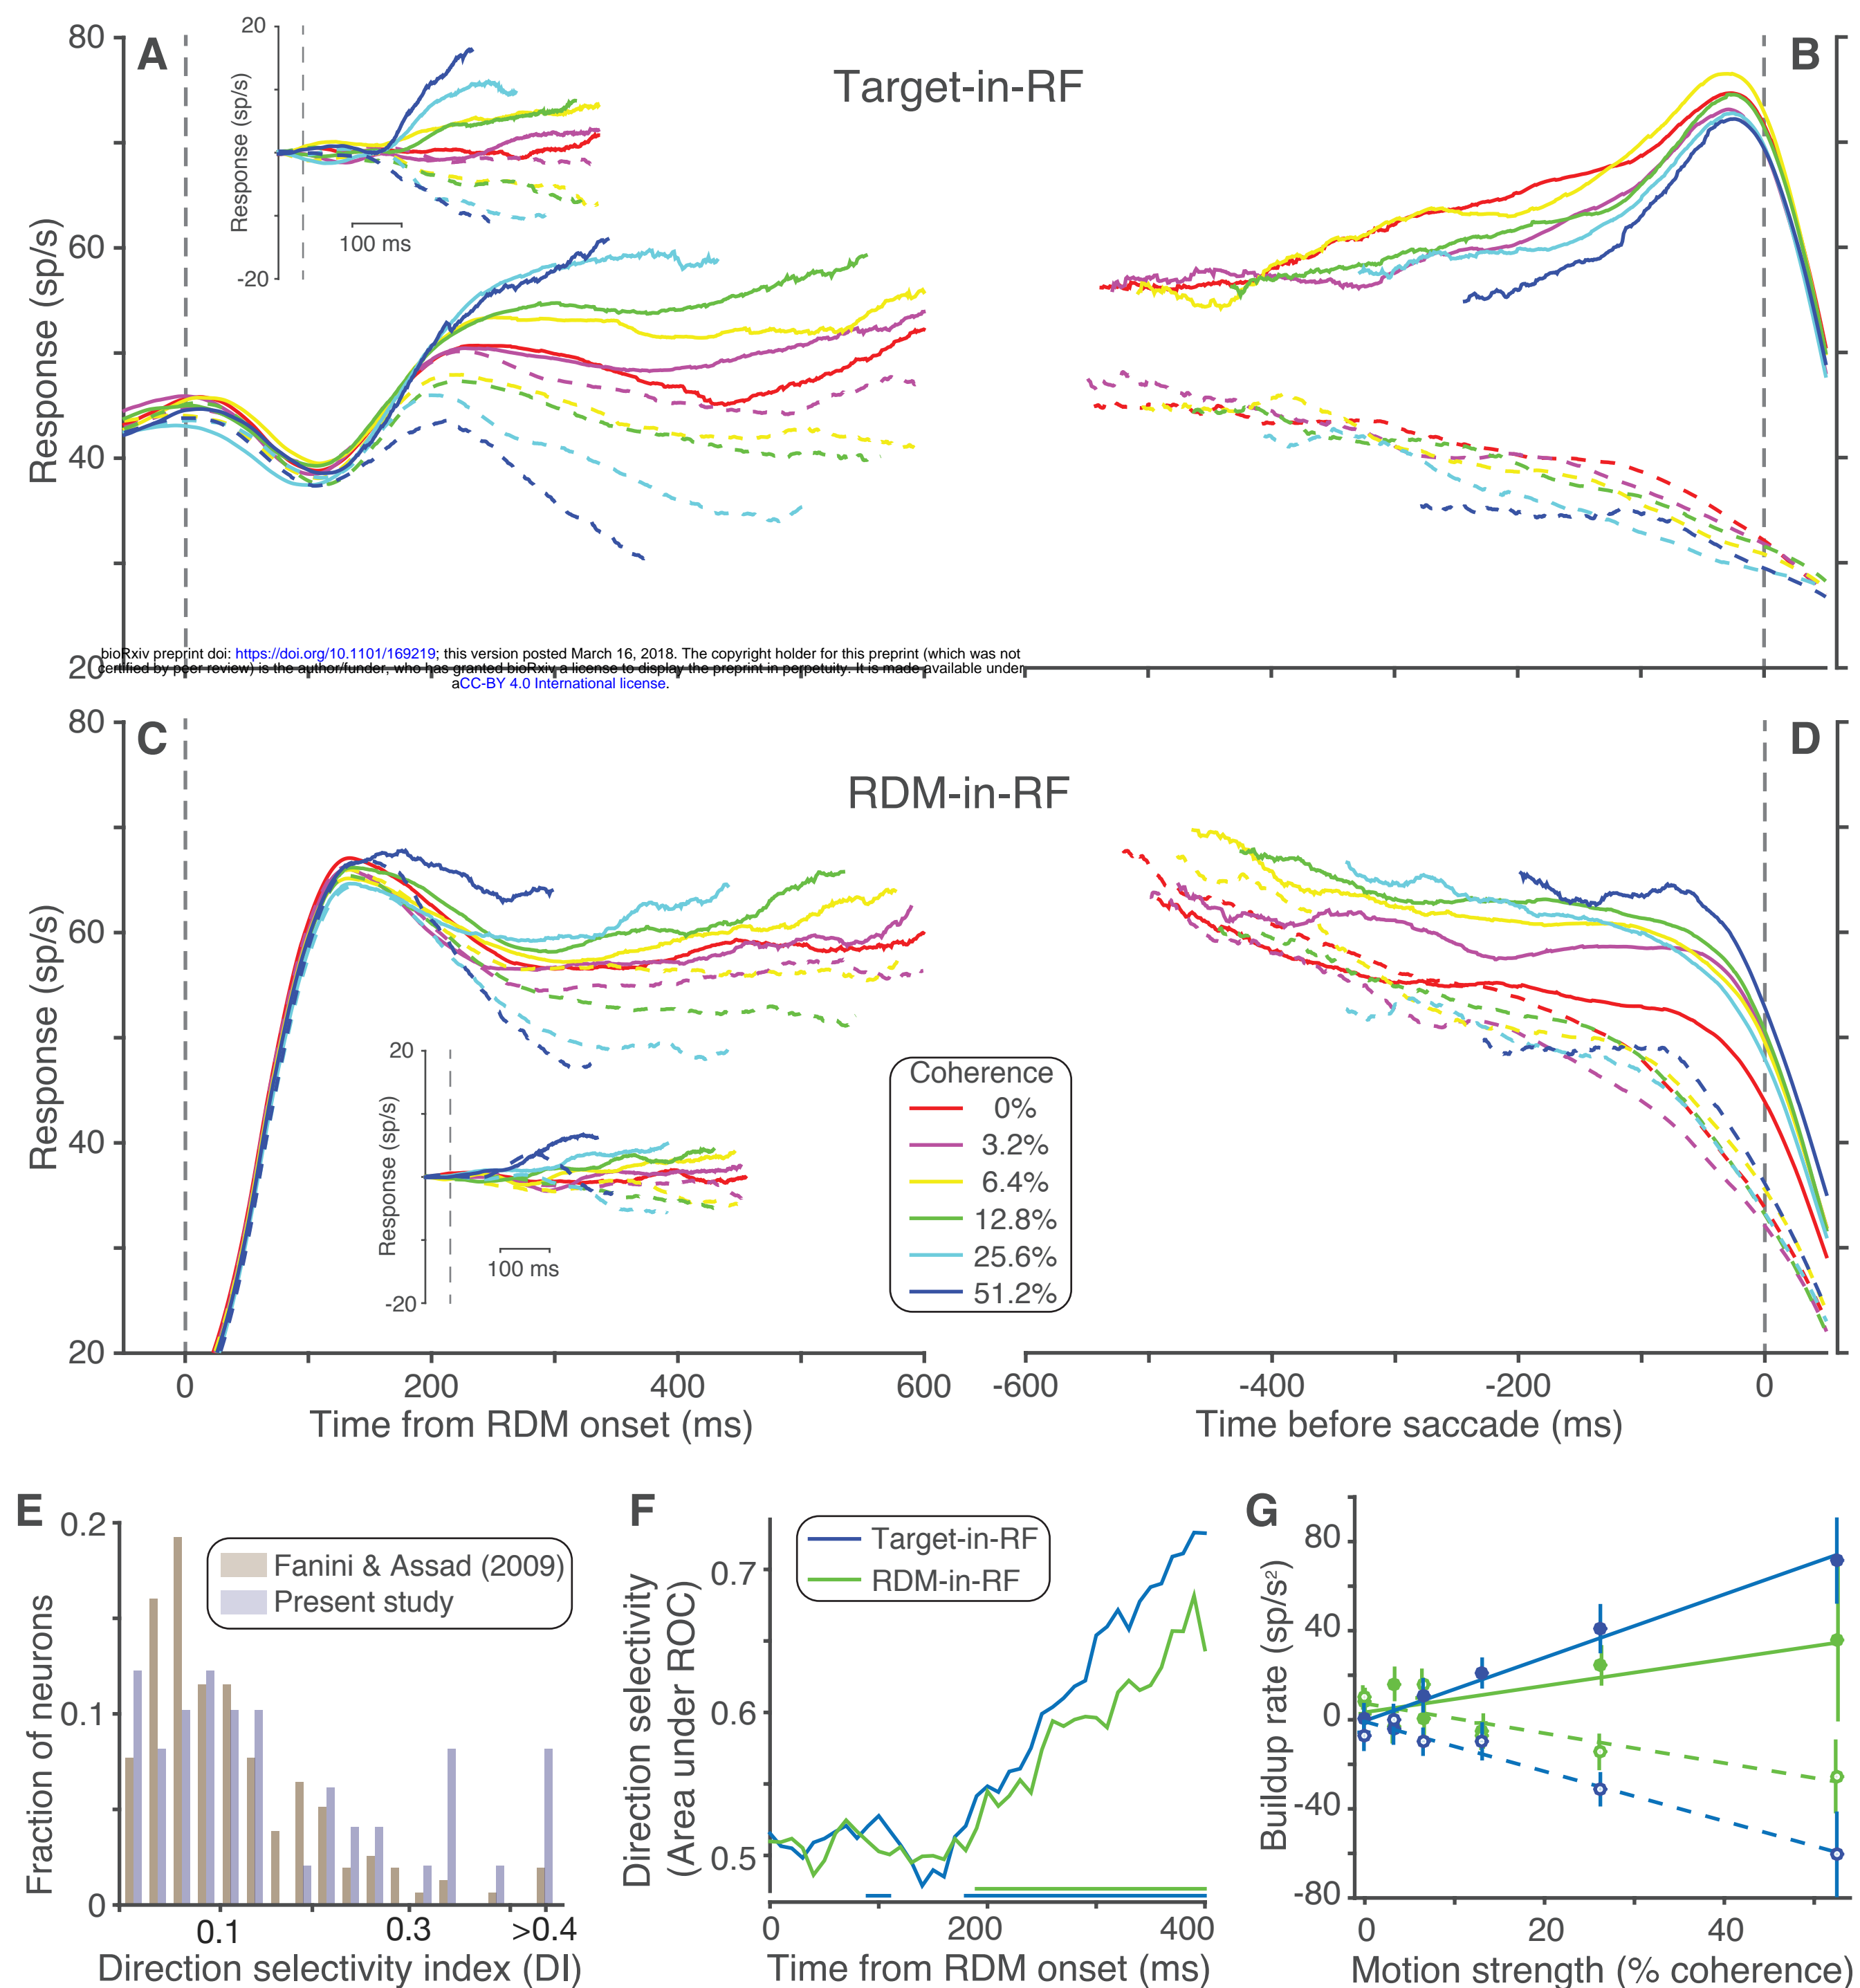

**Fig. 3**

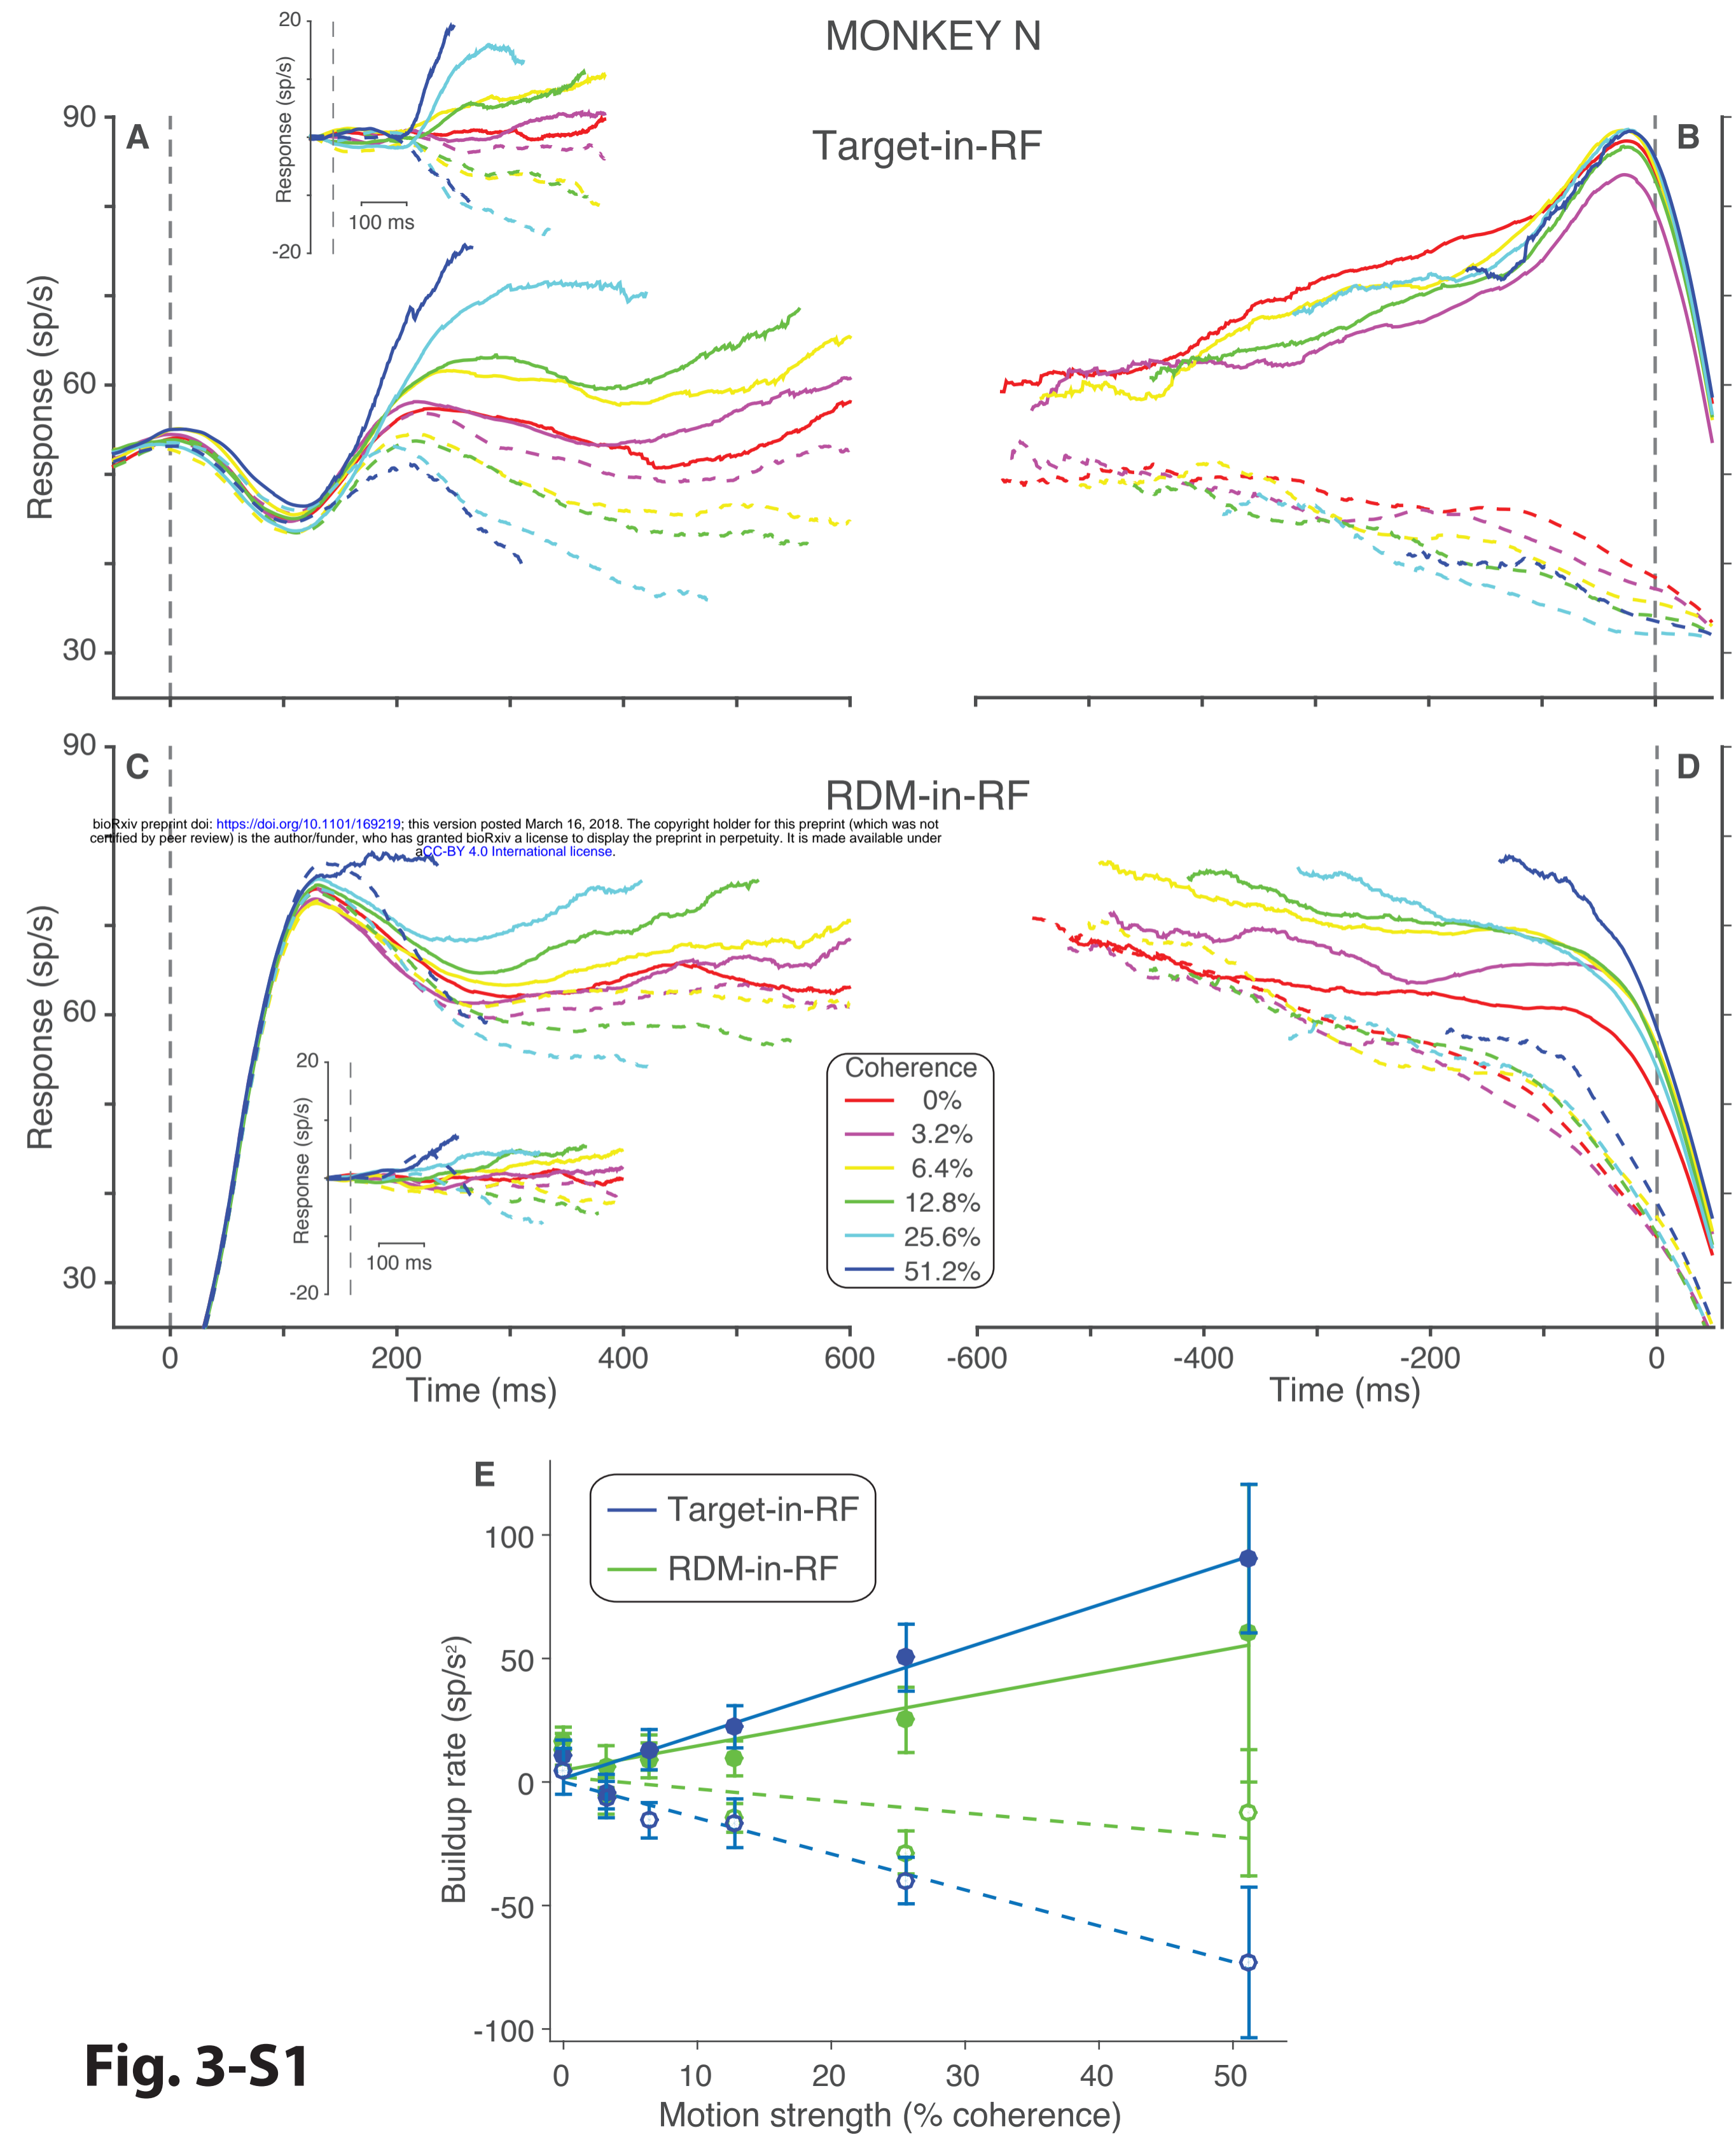

**Fig. 3-S1**

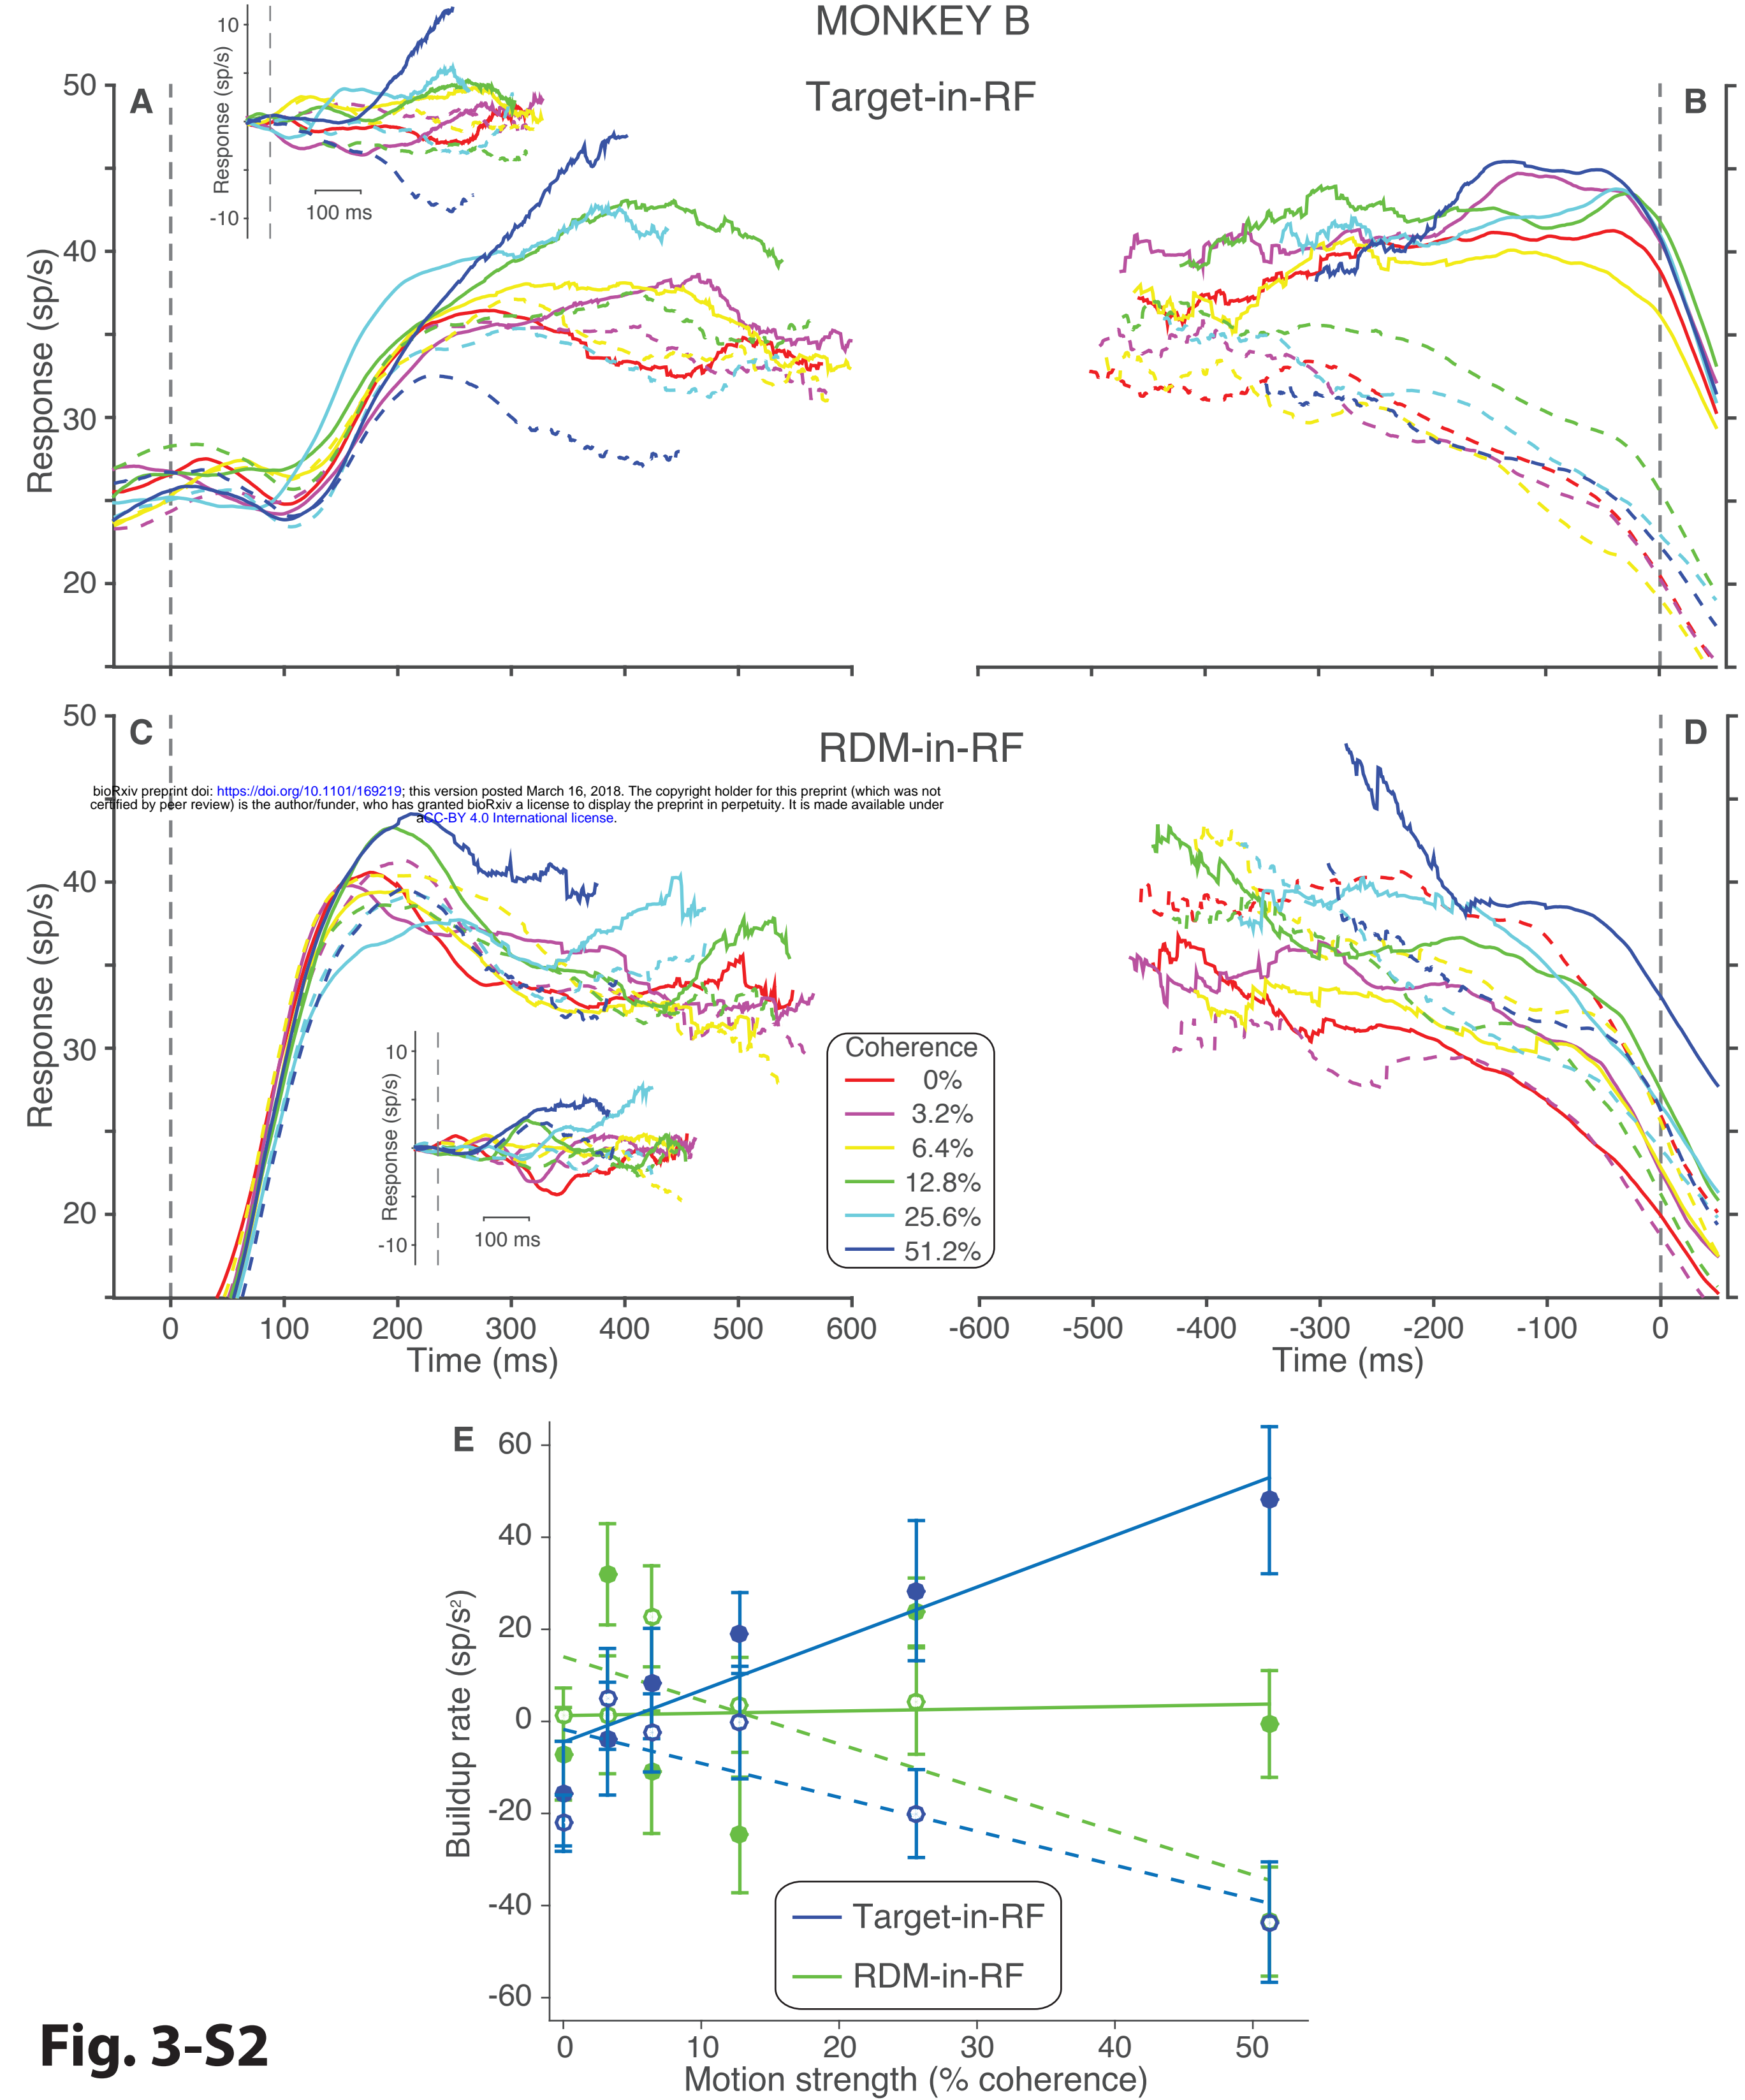

**Fig. 3-S2**

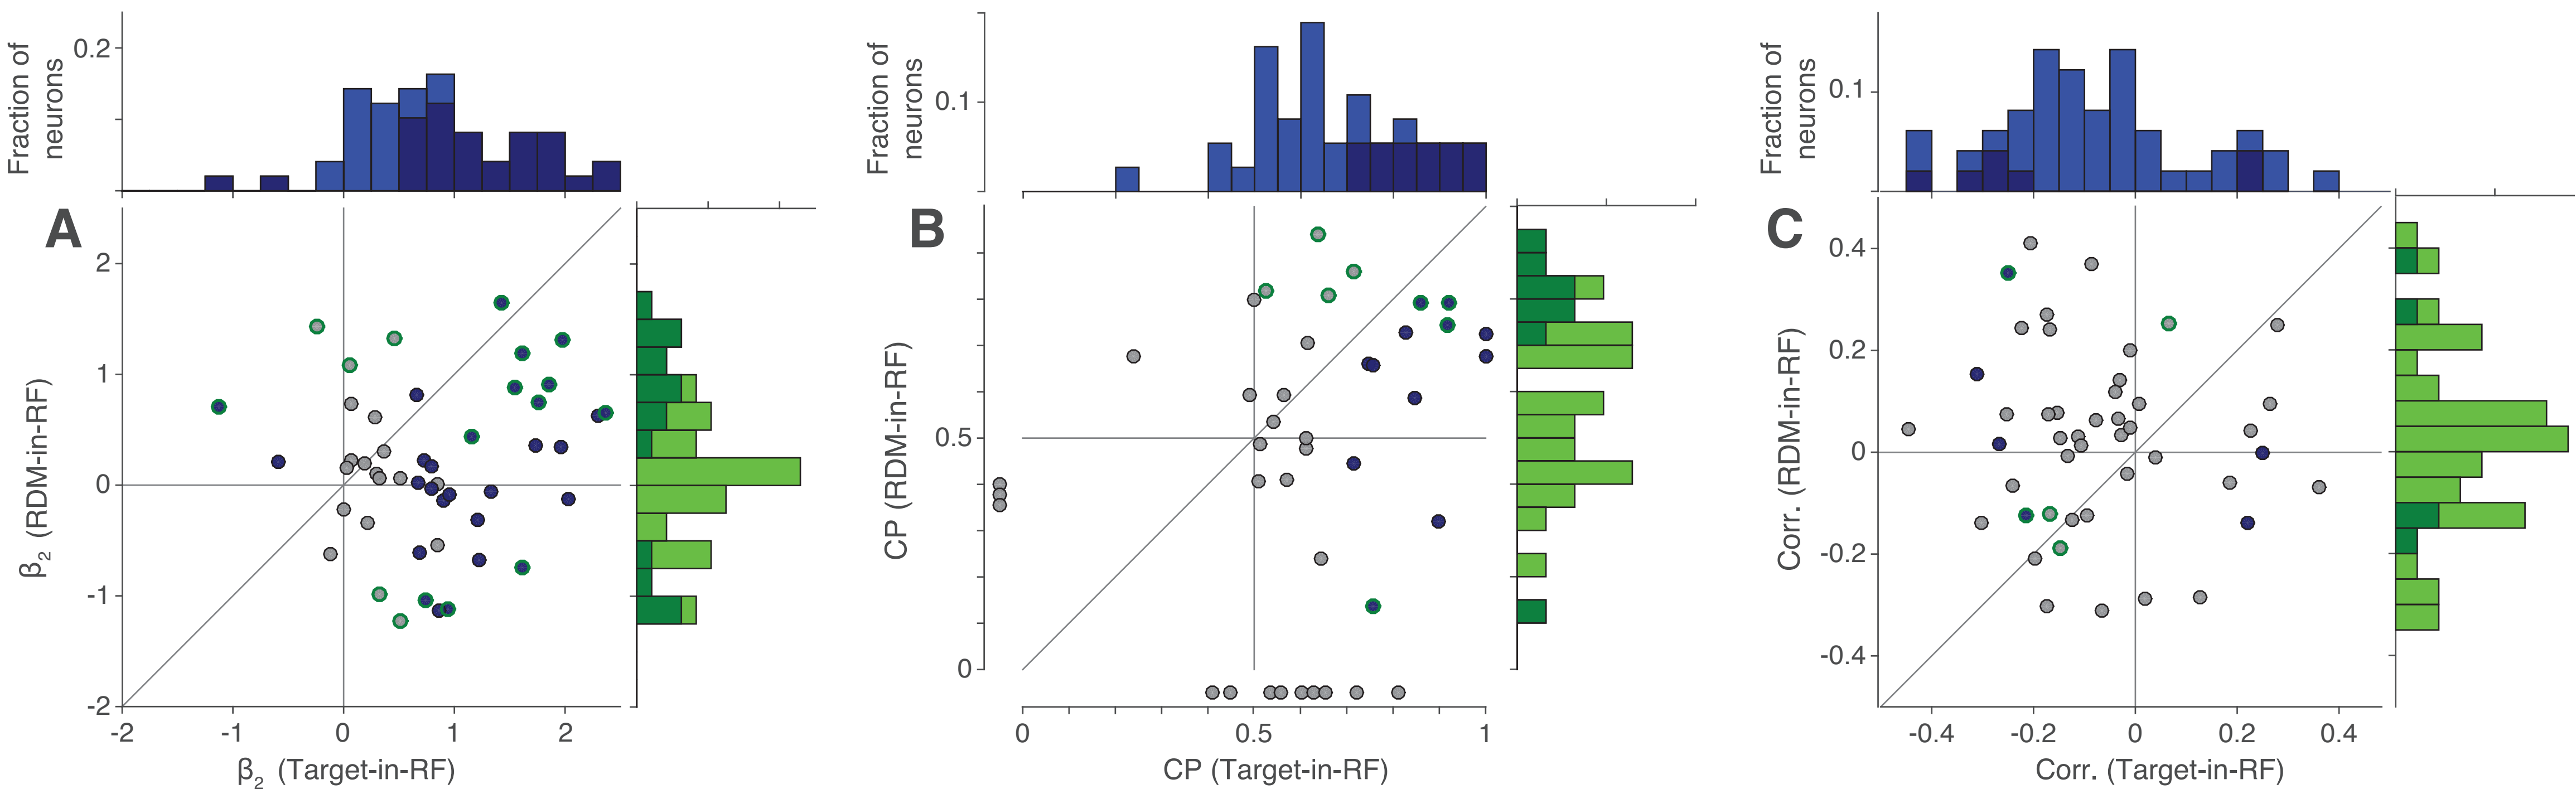

**Fig. 4**

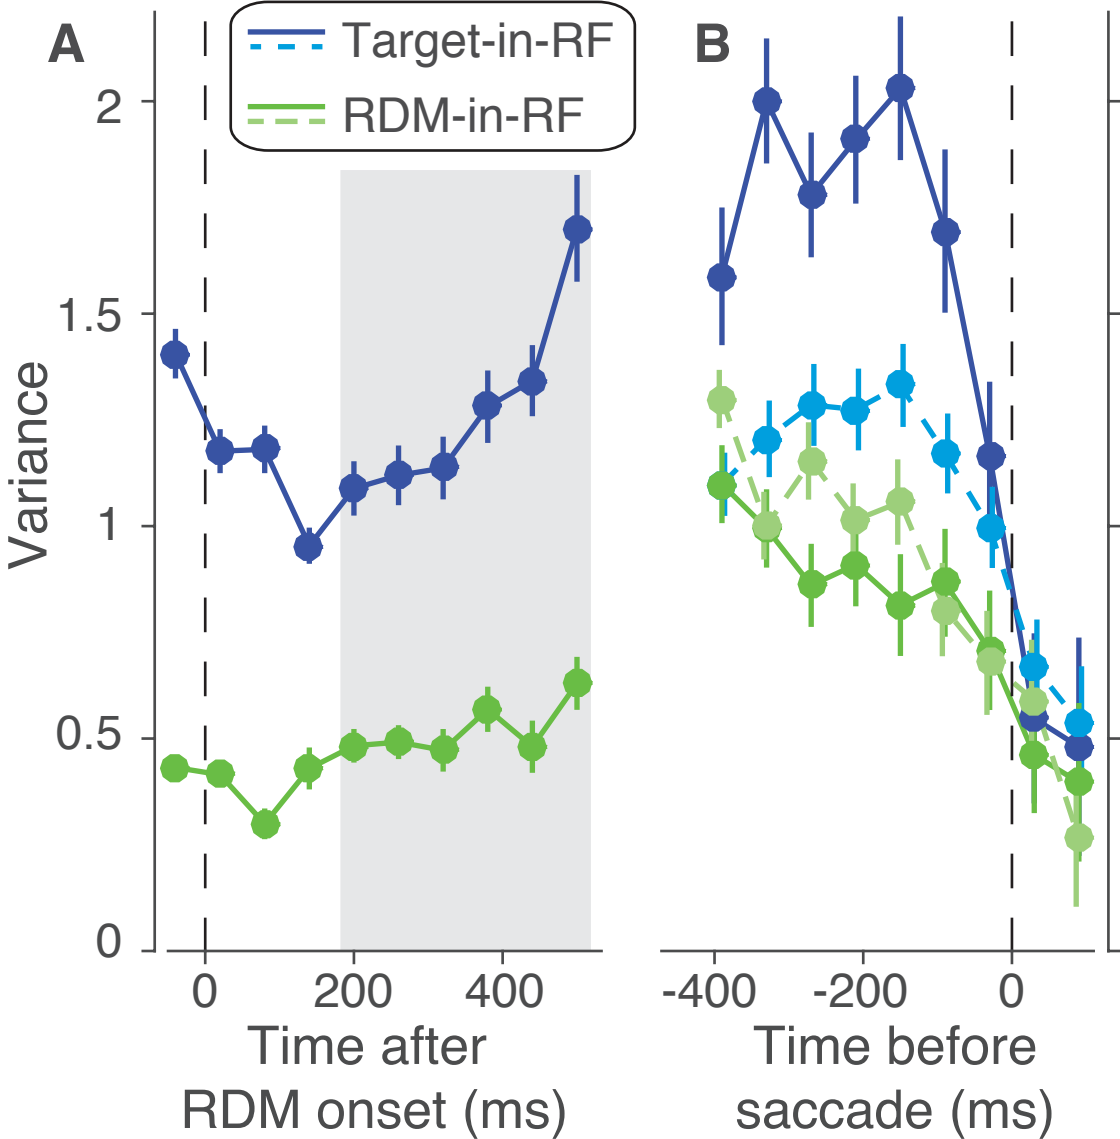

**Fig. 5**

**Fig. 6**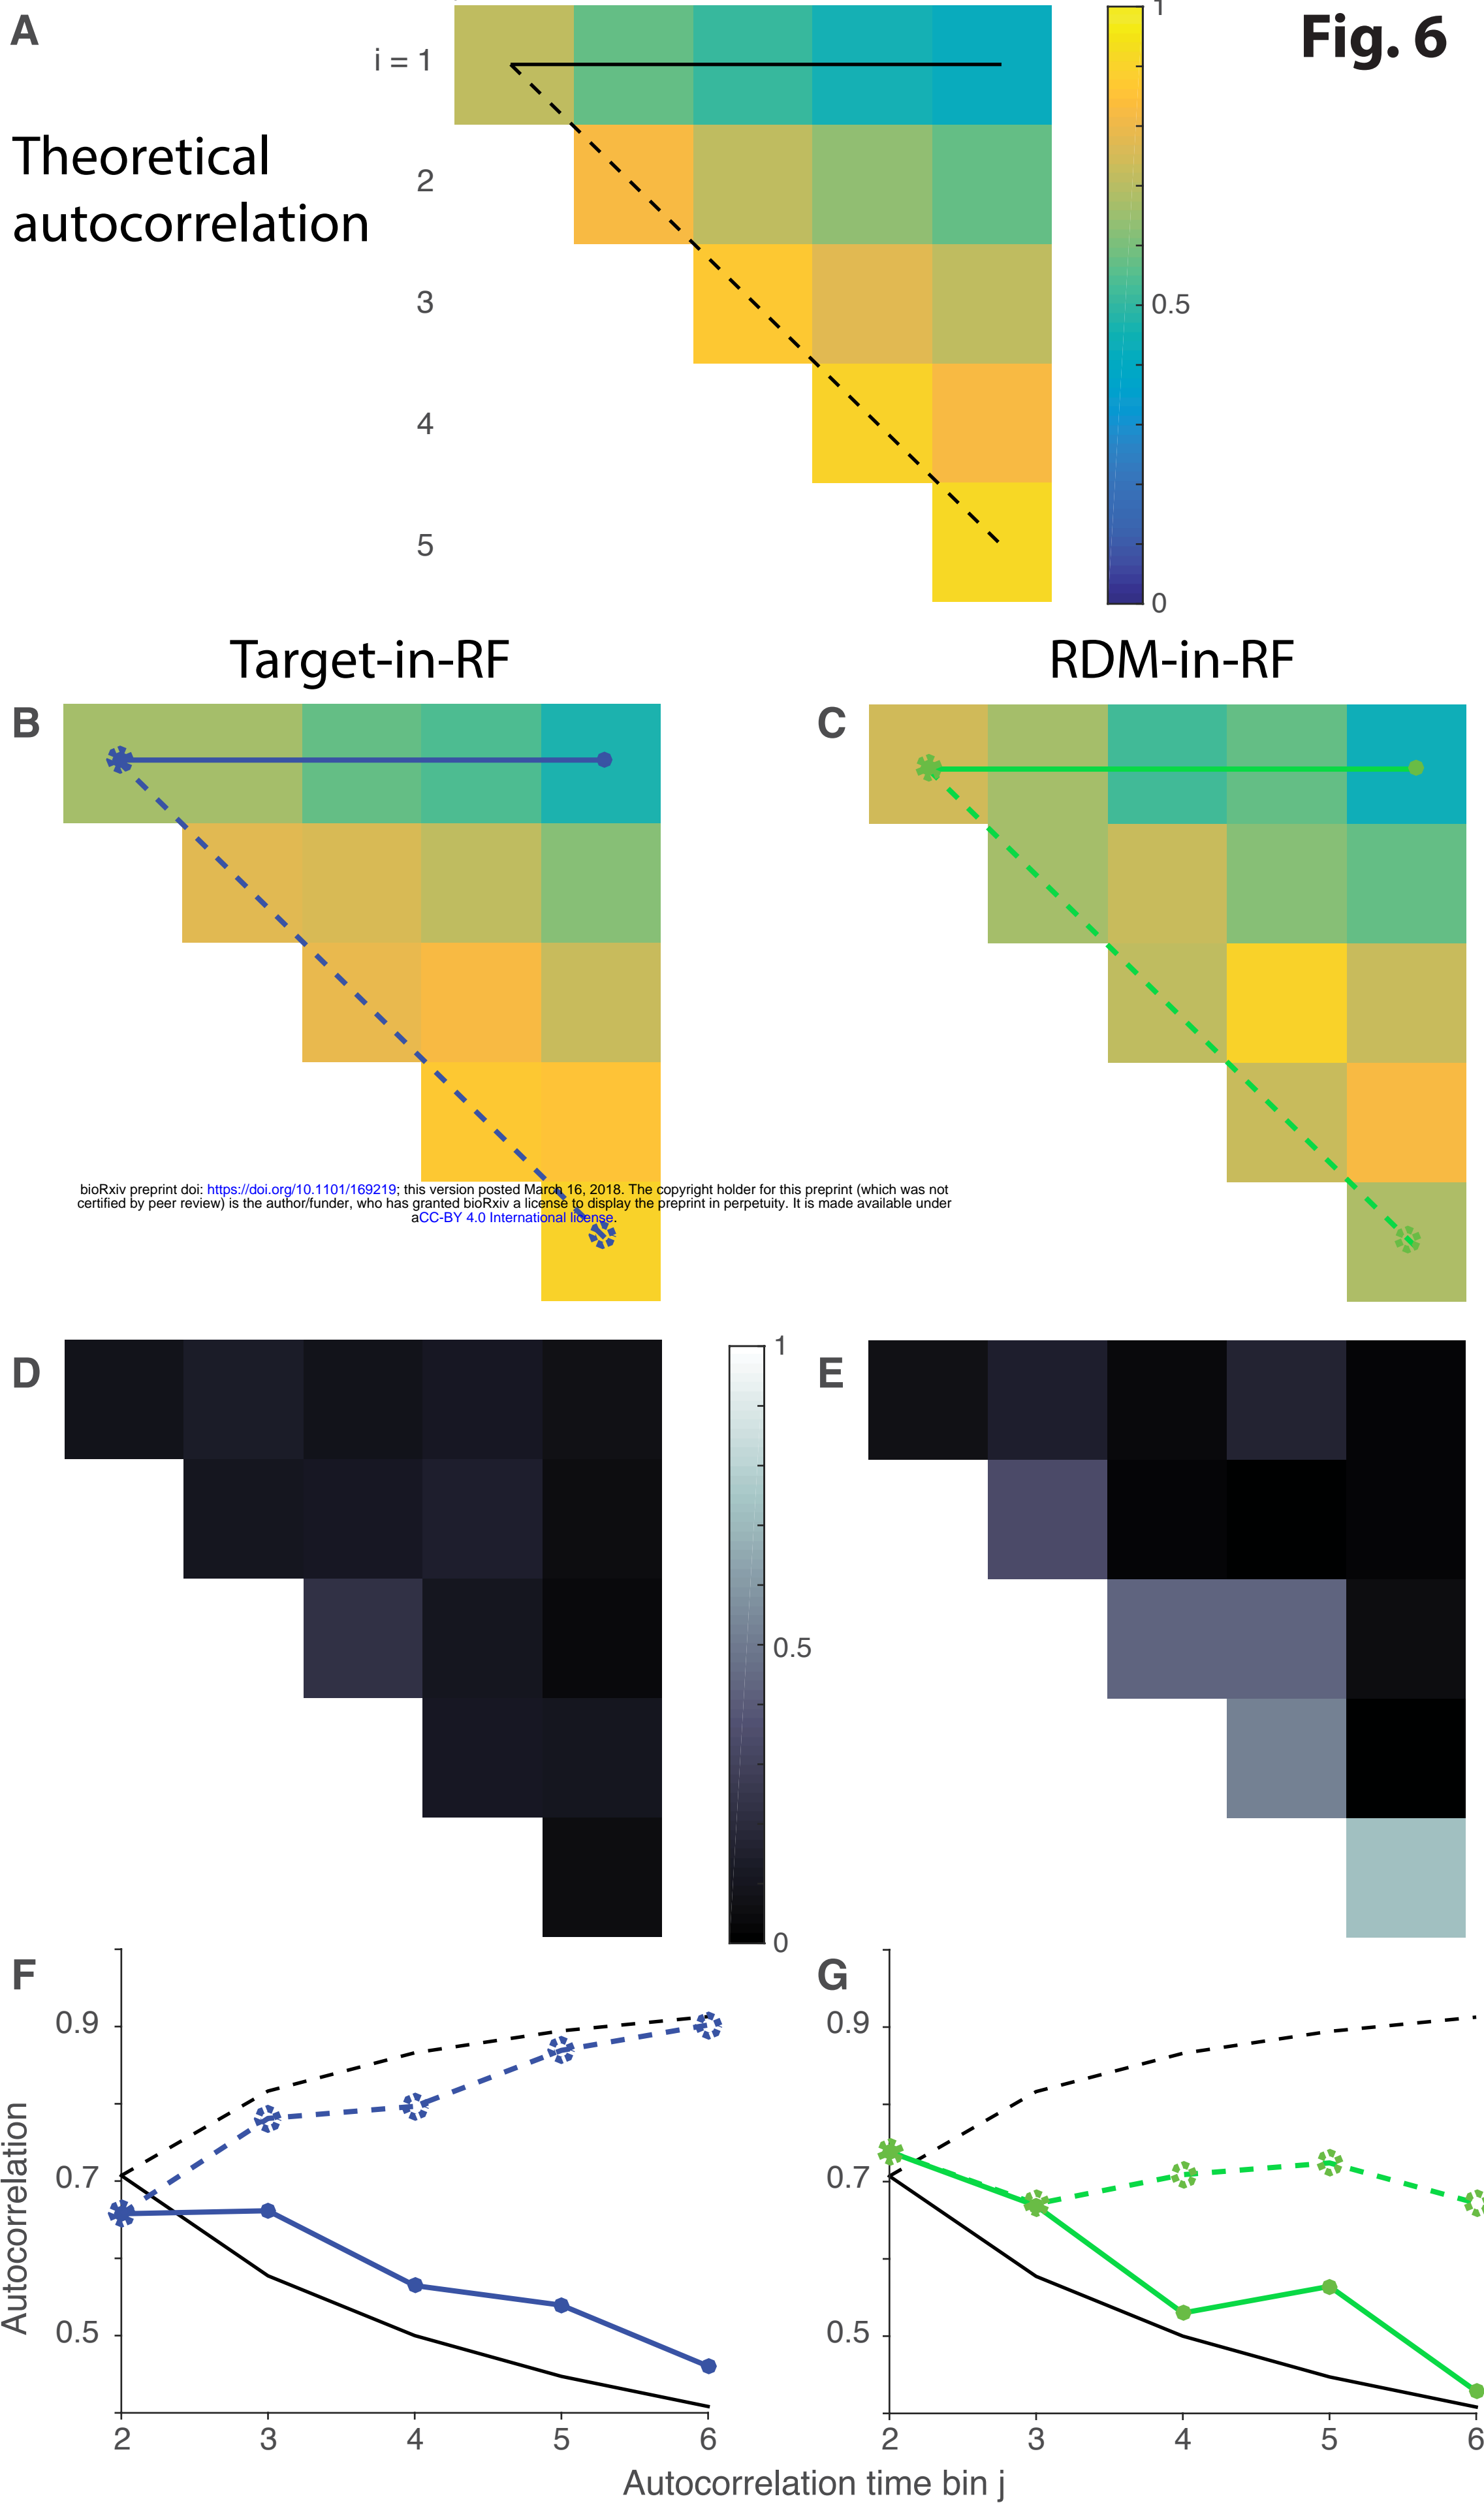



**Fig. 7**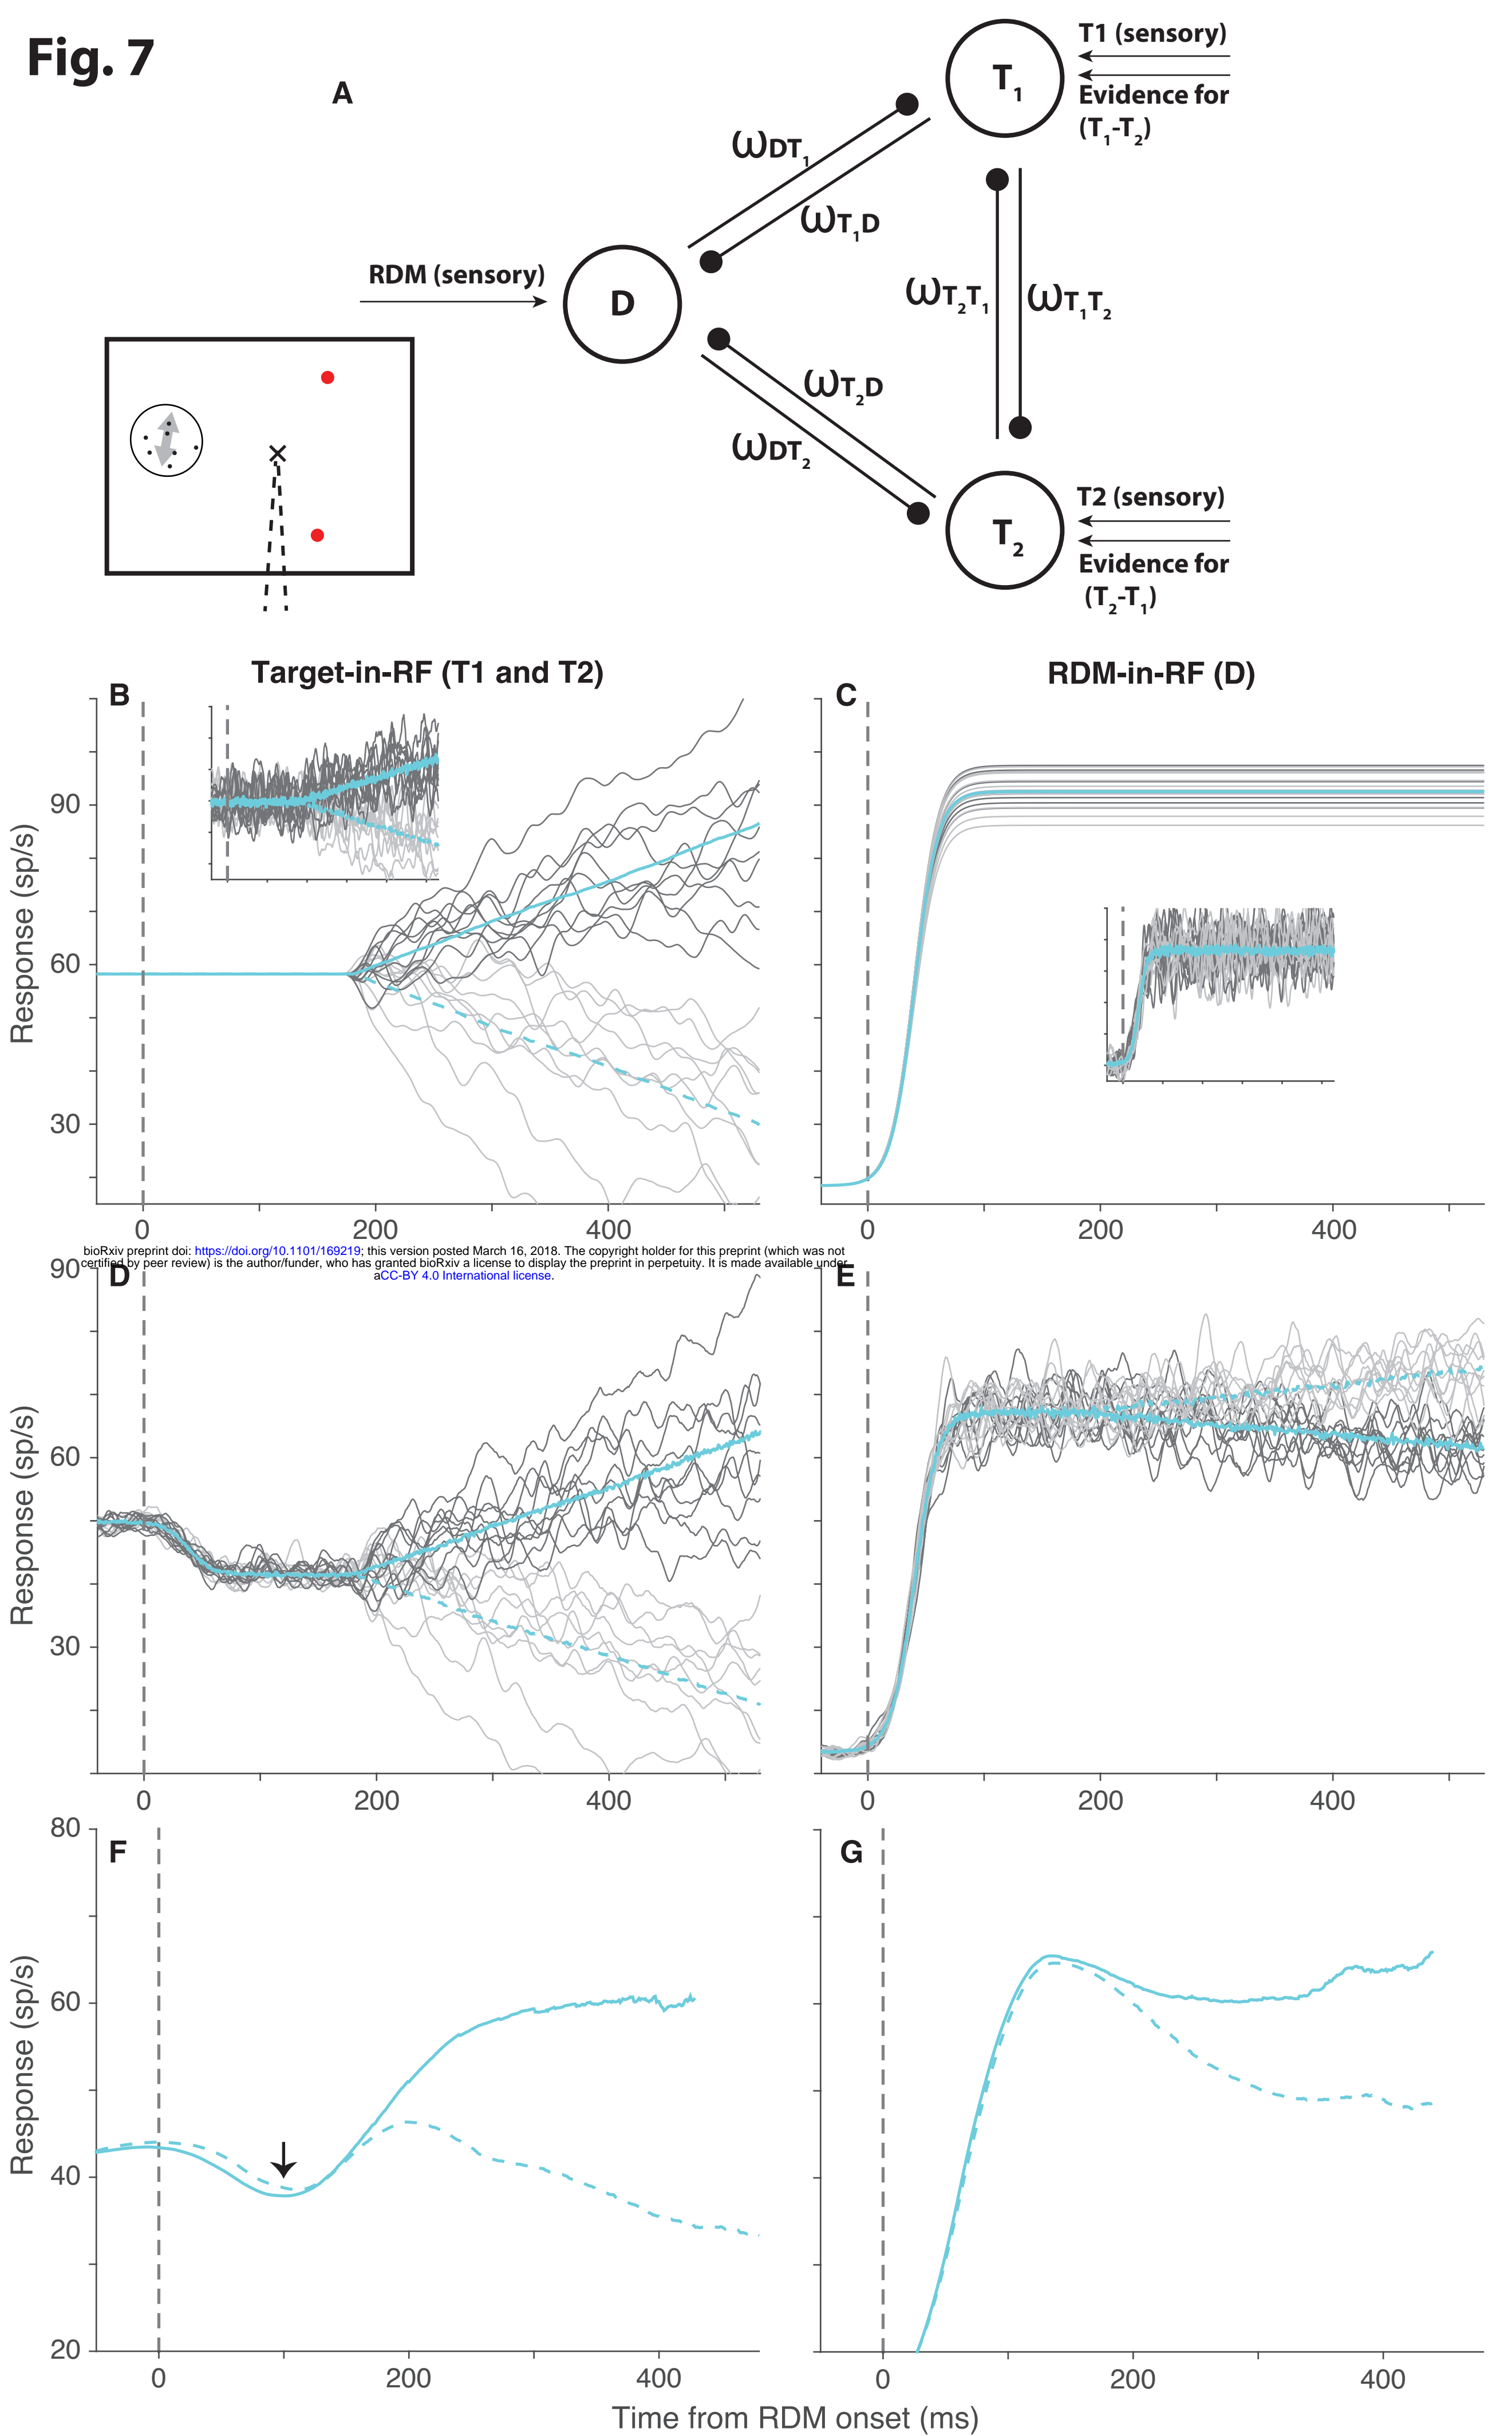

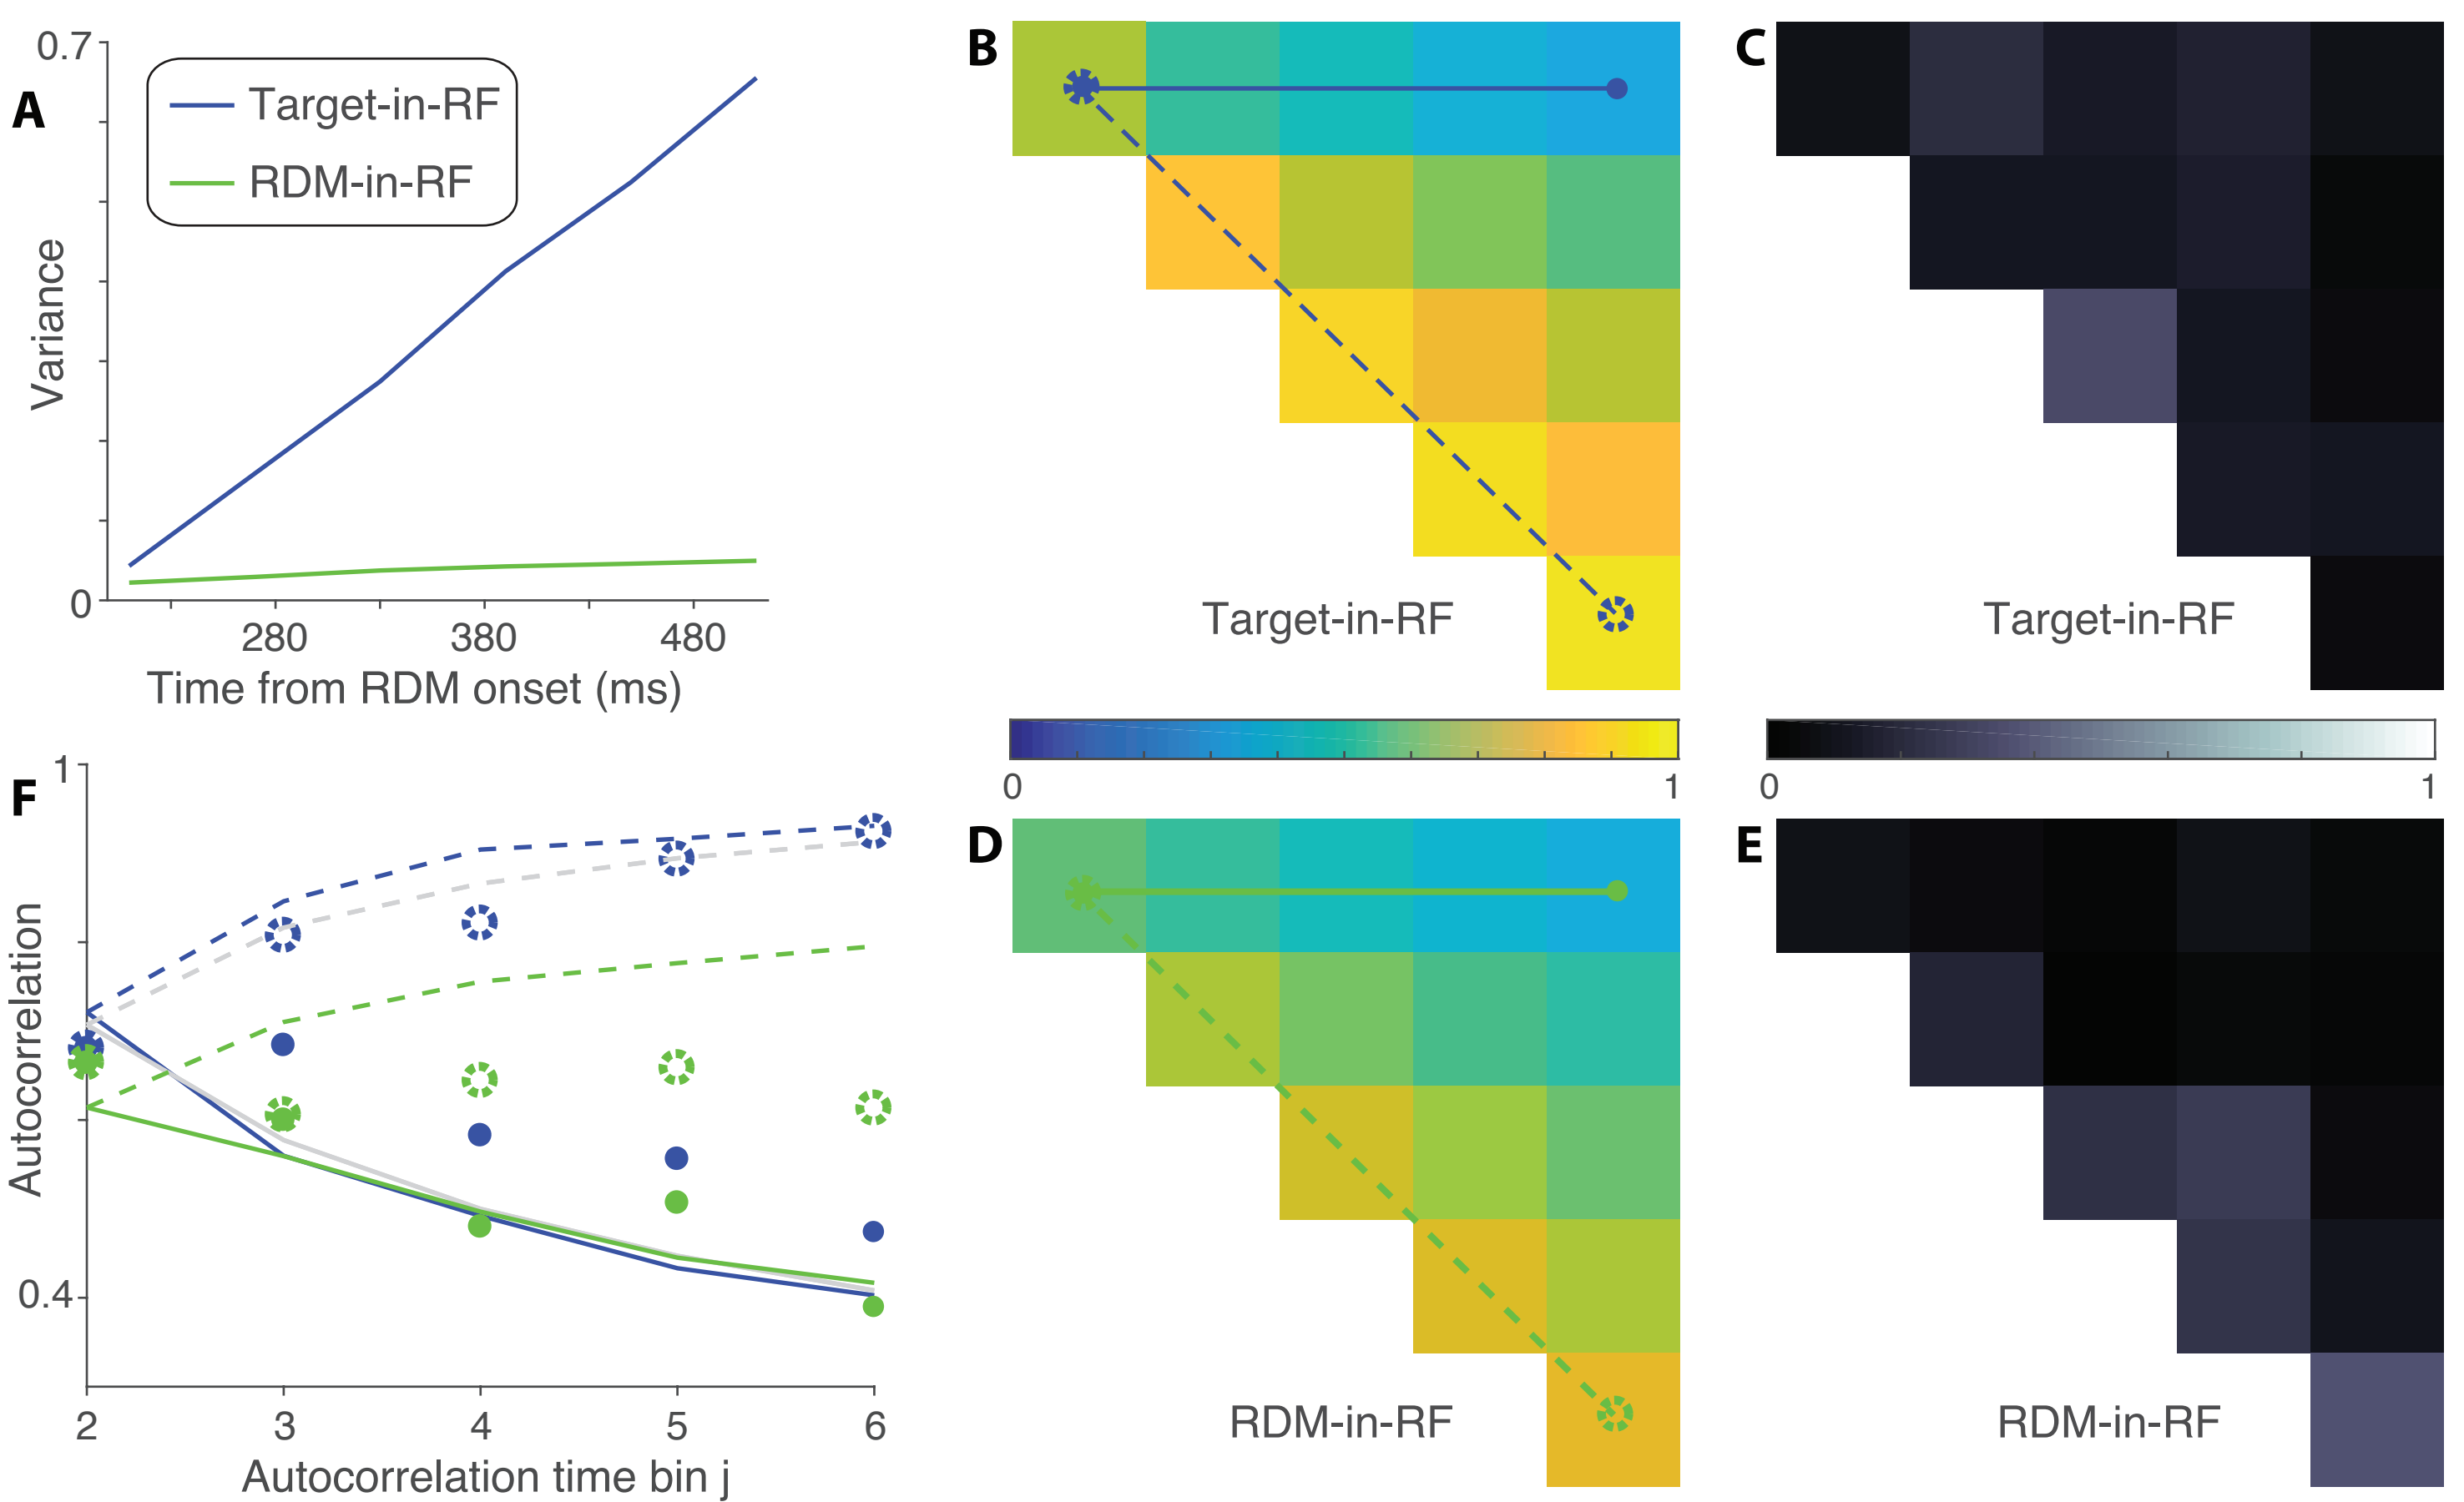

**Fig. 8**

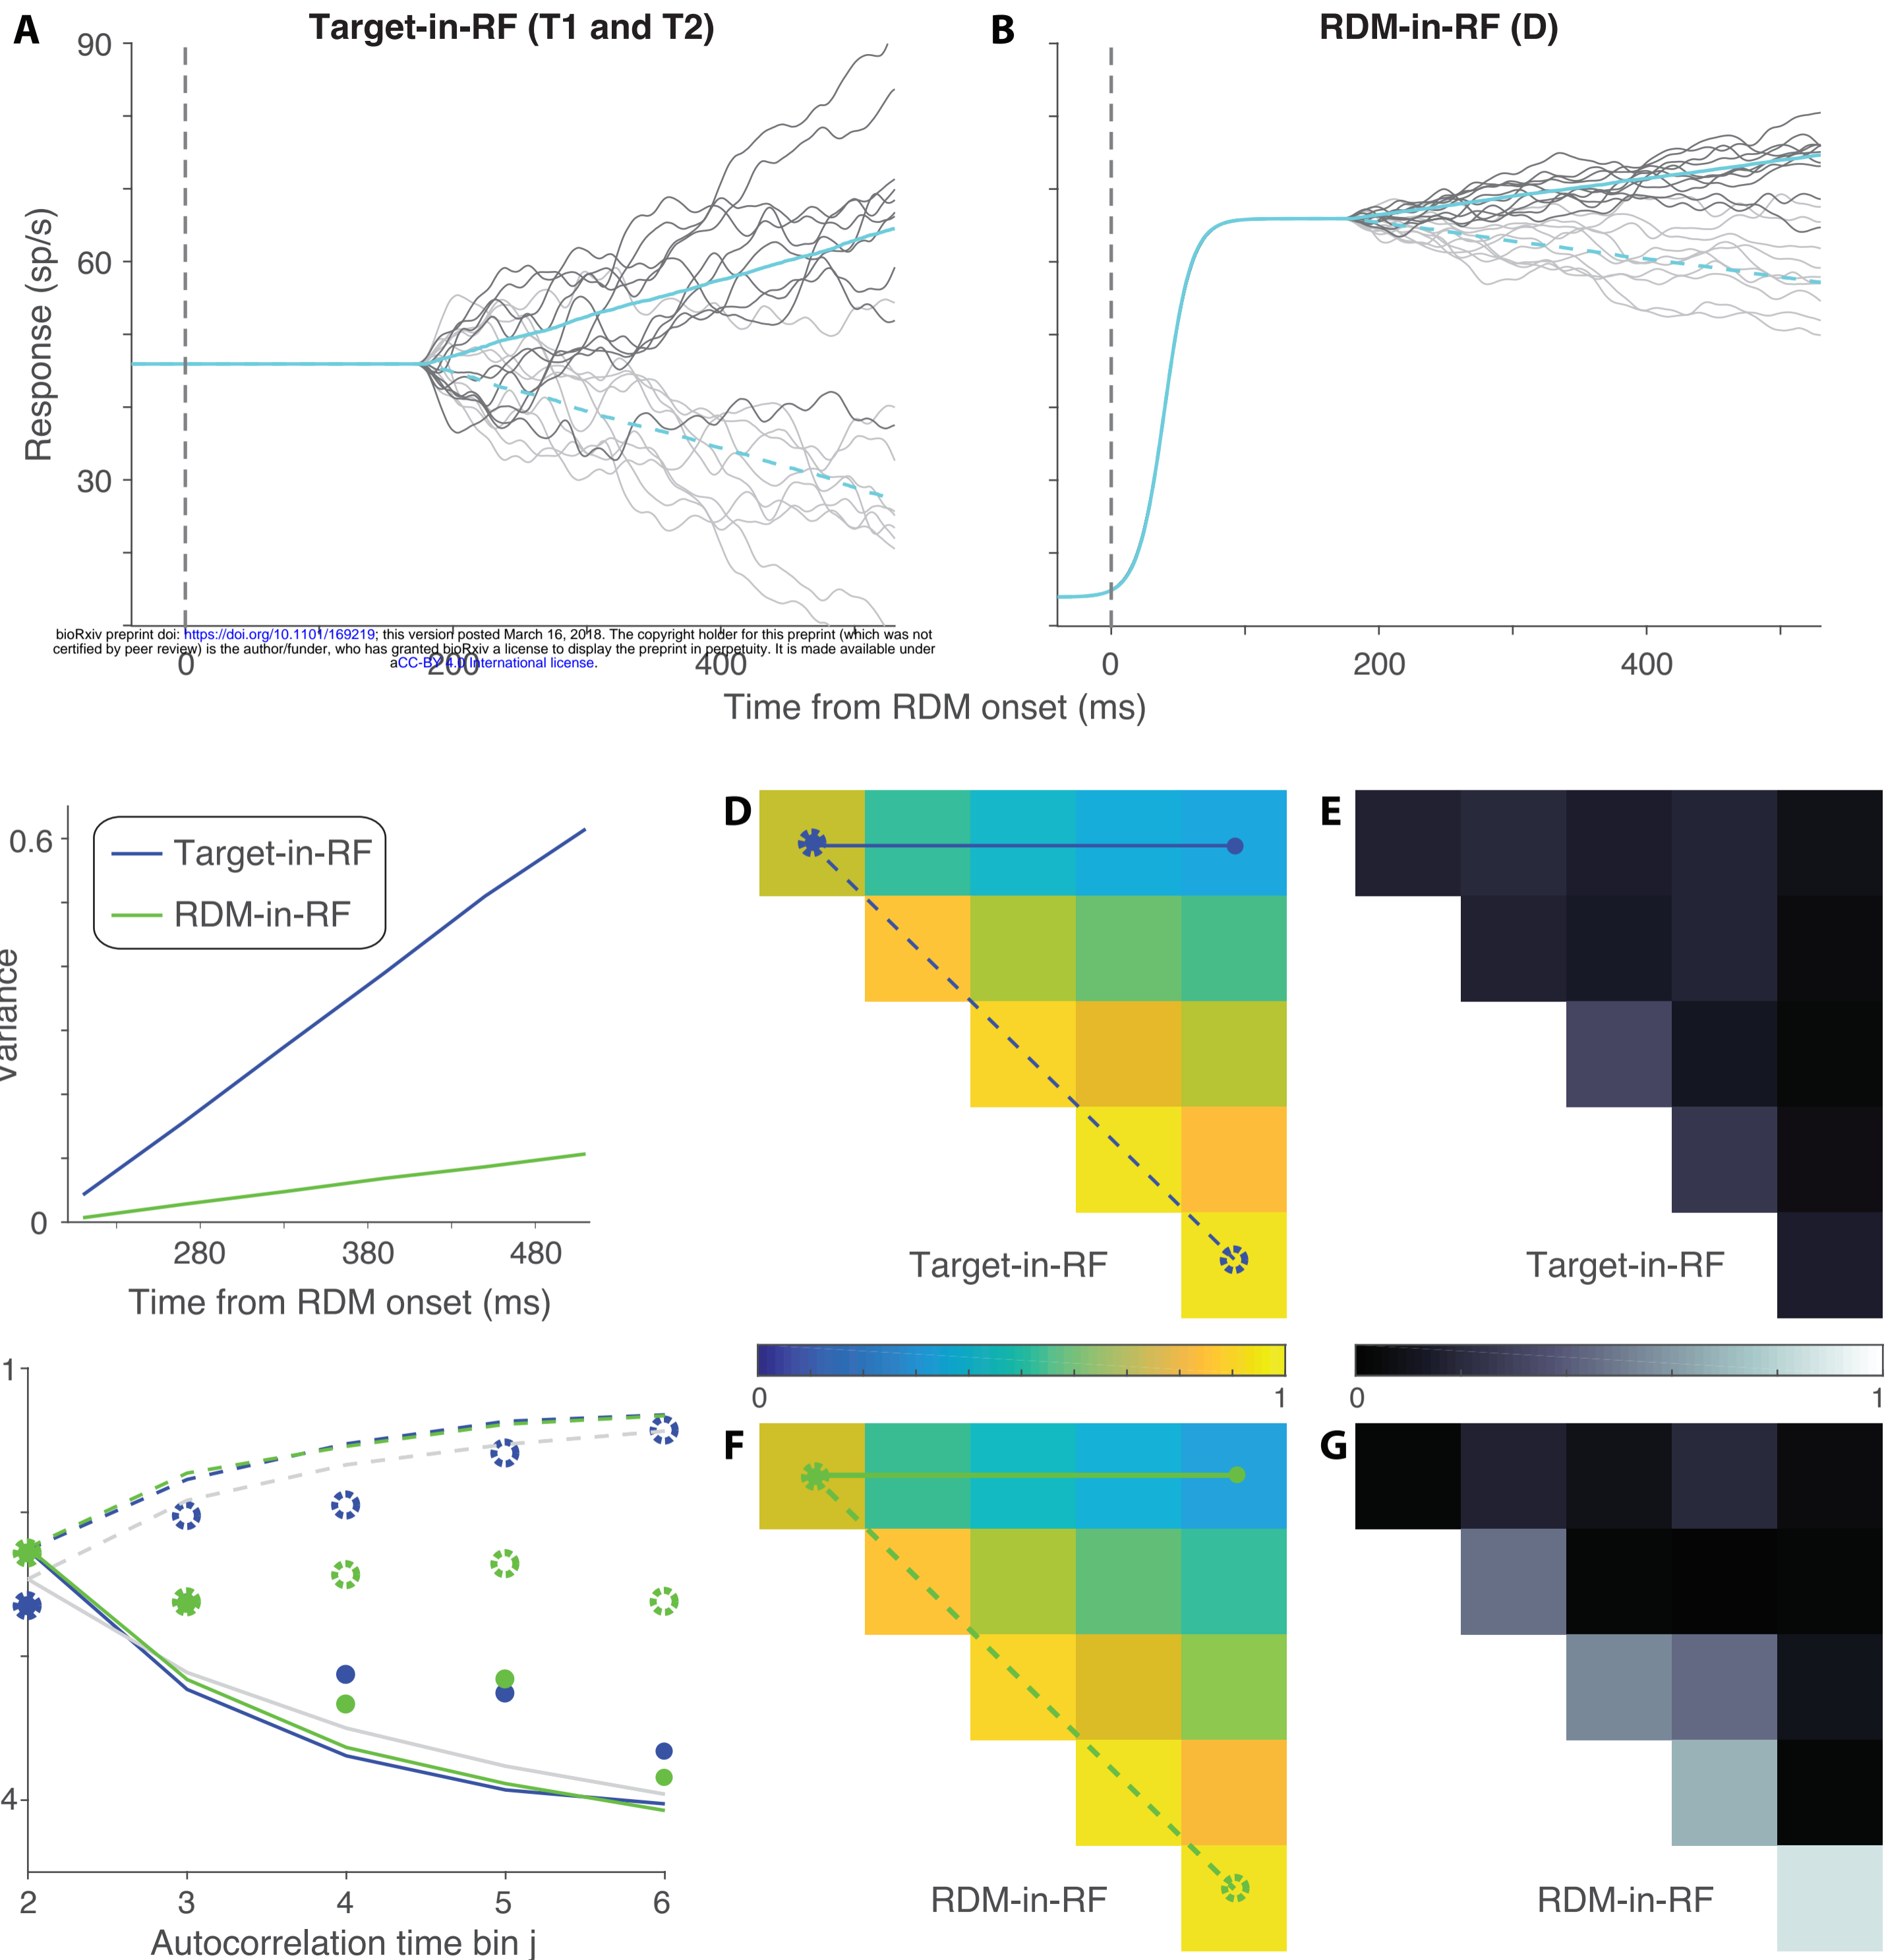

**Fig. 9**
